# Supplementary material for: Modelling scenarios of environmental recovery after implementation of controls on emissions of persistent organic pollutants
Source: Royal Society of Chemistry journal article supplement (doi:10.1039/d0em00137f), 2020-01-01
Supplement: d0em00137f1.pdf [file d0em00137f1.pdf]

## **Modelling scenarios of environmental recovery after implementation of controls on emissions of persistent organic pollutants**

**S. D. W. Comber<sup>1</sup>, M. J. Gardner<sup>2</sup>, C. Constantino<sup>2</sup>, S. Firth<sup>2</sup>, A. Hargreaves<sup>2</sup> and R Davies<sup>2</sup>**

<sup>1</sup> Plymouth University, B531, Portland Square, Drake Circus, Plymouth, Devon, PL4 8AA UK

<sup>2</sup> Oasis Business Park Eynsham Oxford OX29 4AH United Kingdom. Tel: +44 1865 882828; email: sean.comber@plymouth.ac.uk

**Table S1 Substances – an approximate initial prioritisation for searching for source data**

| Substance                                                                           | Notes as guidance in prioritising data searches                                                                                                                                           |
|-------------------------------------------------------------------------------------|-------------------------------------------------------------------------------------------------------------------------------------------------------------------------------------------|
| <b>a) Data likely to be available in a suitable form and of appropriate quality</b> | <i>The main focus for data gathering. No requirement to devote too much effort on concentrations from effluents. Surface water values might be useful as check on calculation outputs</i> |
| TBT                                                                                 | Much data likely to be available – possible issue with focus on contaminated sites                                                                                                        |
| methyl-mercury                                                                      | Data for mercury are available – estimation of likely proportion of me-Hg required                                                                                                        |
| PCBs (126,118)                                                                      | Data for all commonly determined or total PCBs useful – not these congeners only                                                                                                          |
| HBCDD                                                                               | Sewage the major source – half-life moderate                                                                                                                                              |
| Cypermethrin                                                                        | Sewage the major source – half-life short                                                                                                                                                 |
| PFOS                                                                                | Likely requirement to consider sources generally                                                                                                                                          |
| PFOA                                                                                | Likely requirement to consider sources generally                                                                                                                                          |
| Benzo(a)pyrene                                                                      | Need estimates of non-sewage sources for load inputs                                                                                                                                      |
| Fluoranthene                                                                        | Need estimates of non-sewage sources for load inputs                                                                                                                                      |
| DEHP                                                                                | Fate with respect to sediment crucial – need Kp values as priority – might put in category c)                                                                                             |
|                                                                                     |                                                                                                                                                                                           |
| <b>b) Data not likely to be so readily available</b>                                | <i>Need to look carefully, but not to the detriment of progress on category a) substances – will take forward if suitable data are there</i>                                              |
| HCB                                                                                 | Historic contaminant – less likely to have up to date information – possible issue with historic data quality – focus on contaminated sites                                               |
| HCBD                                                                                | Historic contaminant – less likely to have up to date information – possible issue with historic data quality – focus on contaminated sites                                               |
| HCH                                                                                 | Historic contaminant – less likely to have up to date information – possible issue with historic data quality – focus on contaminated sites                                               |
| Pentachloro-benzene (PeCB)                                                          | Never routinely monitored in UK?                                                                                                                                                          |
| Dioxins & dioxin-like compounds                                                     | Do not expect much of the essential information necessarily to be available – possibly more of an overview needed – could be category c)                                                  |
| Heptachlor/H-epoxide                                                                | Do not expect much of the essential information necessarily to be available – possibly more of an overview needed                                                                         |
| Quinoxifen                                                                          | Data?                                                                                                                                                                                     |
|                                                                                     |                                                                                                                                                                                           |
| <b>c) Not suited to this approach? / likely no worthwhile data?</b>                 |                                                                                                                                                                                           |
| Lead                                                                                | Infinitely persistent hence no mechanism for reduction in concentration other than by dilution or translocation (which are not part of the project)                                       |
| Cadmium                                                                             | Infinitely persistent hence no mechanism for reduction in concentration other than by dilution or translocation                                                                           |
| Chloroalkanes (SCCPs)                                                               | Definition of the determinand is based on methodology that might be better defined – hence likely high uncertainty in data quality and what data might mean                               |
| Anthracene                                                                          | Is there a compliance issue?                                                                                                                                                              |
| Dicofol                                                                             | Not a persistent pollutant                                                                                                                                                                |

**Table S2 Key inputs and notes**

| <b>Input</b>                                               | <b>Units</b>                         | <b>Notes</b>                                                                                                                                                                                                                                                                  |
|------------------------------------------------------------|--------------------------------------|-------------------------------------------------------------------------------------------------------------------------------------------------------------------------------------------------------------------------------------------------------------------------------|
| <b>initial sediment concentration</b>                      | µg/kg                                | Can be set at the likely equilibrium value based on previous inputs – or at any other starting value.                                                                                                                                                                         |
| <b>initial rate of addition</b>                            | µg/kg/year                           | Requires derivation based on concentrations-in/loads-from input sources and the size of the “sediment target” (see Table S2 below)                                                                                                                                            |
| <b>reduced rate of addition</b>                            | percentage of initial input per year | Reduction in input as a percentage of initial input per year - based on the “measures” taken to reduce inputs                                                                                                                                                                 |
| <b>Biota-Sediment Concentration Factor (BSCF) to biota</b> | n/a                                  | Biota-Sediment Concentration Factor – the ratio of concentration in biota to that in sediment <sup>1</sup> . From literature – though care needed in assessment of relevance and credibility                                                                                  |
| <b>half-life (t<sub>1/2</sub>) in sediment</b>             | years                                | From literature – though care needed in assessment of relevance and credibility                                                                                                                                                                                               |
| <b>Water/sediment partition coefficient, k<sub>p</sub></b> | l/kg                                 | Used to estimate the proportion of inputs that are associated-with/accumulated-in sediment – should be relevant to the type of suspended particulate material envisaged<br>Likely to require derivation from a number of different inputs – k(ow) k(oc) various k(spm) values |

---

<sup>1</sup> BSCF - also known as a BSAF Biota Sediment Accumulation Factor

**Table S3 Data for input and to support the input values – for derivation purposes**

| <b>Input</b>                                                | <b>Units</b> | <b>Notes</b>                                                                                                                                                                                                     |
|-------------------------------------------------------------|--------------|------------------------------------------------------------------------------------------------------------------------------------------------------------------------------------------------------------------|
| <b>Input concentration – point source</b>                   | µg/l         | We stipulate that the point source is a sewage effluent discharges<br><br>Note influence of local sources – how relevant and representative is the reported value? Is monitoring related to “unusual” pollution? |
| <b>Input load to sediment – non- point source</b>           | µg/yr        | An estimate of generic non-point sources to input rate – to be added to the point source-derived input rate                                                                                                      |
| <b>Half-life (t<sub>1/2</sub>) of substance in sediment</b> | years        | A range of reported values in likely – why is this?                                                                                                                                                              |
| <b>BSCF to biota</b>                                        | n/a          | Biota-sediment concentration factor – the ratio of concentration in biota to that in sediment<br><br>From literature – though care needed in assessment of relevance and credibility                             |
| <b>Various measures of partitioning kp values</b>           | l/kg         | Expressed on various ways and (possibly) translatable to a generic kp.<br><br>The key challenge here is to understand what is being quoted                                                                       |
| <b>Sediment concentration value</b>                         | µg/kg        | As check on plausibility of initial value in above table<br><br>Note influence of local sources – how relevant and representative is the reported value? Is monitoring related to “unusual” pollution?           |
| <b>Mass of sediment target</b>                              | kg           | Plausible value derived from notional point source (sewage works) inputs and in-river dilution<br><br><b>So NOT required from literature</b>                                                                     |

## **S1 Review of available data**

Table S3 provides some preliminary guidance on the approach to a search for literature data. The search prioritised key substances for which the publication of sufficient data of a suitable quality would make it possible to progress to the stage of estimating the likely decline in contaminant concentrations. The first stage was to divide the substances of interest into three categories:

- a) Those that are of primary interest in that they are regulated under the Water Framework Directive and have been identified as likely to be associated with EQS non-compliance;
- b) Those of secondary interest by reason of likely lack of suitable data;
- c) Those of questionable suitability for the chosen approach and therefore least likely to be taken forward.

The next stage prior to the estimation of changes in contaminant concentrations is to assess the suitability of the data obtained. Reasons for discounting the use of data include:

- Clear focus of the monitoring on polluted sites that are irrelevant to the generic risk assessment aims of the project;
- Lack of relevance to UK conditions;
- Likely data quality issues, often linked to historically high limits of analytical detection;
- Poor comparability amongst different estimated values.

In particular, the relative uncertainty between different categories of inputs can be very different as well as difficult to comprehend. For instance, reported values for BSCF can be highly variable according to the type of biota concerned and the exposure concentration and time. It is virtually impossible to infer the BSCF for other conditions from one reported value other than possibly the relative differences between substances.

Similarly, partition coefficients, expressed on a logarithmic scale (always difficult to envisage), can be given as k-octanol-water or k-organic carbon or true partition coefficient in a particular sediment concerned. Generally, the first in the list is the highest value and the last the lowest. Assumptions about the sorptive power of octanol and organic carbon and the carbon content of sediment can provide a “translation” between these values – but it has to be borne in mind that these involve generalising assumptions. Half-life values too can be influenced greatly by the conditions under which and the concentrations at which they are determined. This tends to lead to the observed wide range of reported values and calls into question their ready transferability to different situations.

In summary, the above discussion emphasises the caveat that this approach to estimating the possible decline in contaminant concentrations is not an attempt to model environmental conditions at a particular site. Rather, it is a way of comparing the likely effects of different controls on contamination on the likely rate of environmental recovery in response to measures to reduce the inputs of trace substances.

**Table S4 Data from the literature**

| Substance | Input                                                    | Value(s)                                                       | Units                     | Descriptive    | Environment              | Location                                                                                                                                                                                    | Details/Notes                                | Reference |
|-----------|----------------------------------------------------------|----------------------------------------------------------------|---------------------------|----------------|--------------------------|---------------------------------------------------------------------------------------------------------------------------------------------------------------------------------------------|----------------------------------------------|-----------|
| TBT       | Concentration (Point Source)                             | 0.47                                                           | ng/L                      | Mean           | Estuarine                | 3 WWTWs, Amour estuary, (SW) France                                                                                                                                                         | <i>n</i> = 9                                 | 1         |
|           | In-River Concentration                                   | <50 – 960<br>288 – 1150<br>96 – 479                            | ng/L (as Sn)              | Range          | Riverine                 | Arosa Rias, Spain<br>Muros Rias, Spain<br>Corcubion Rias, Spain                                                                                                                             | <i>n</i> = ?<br><i>n</i> = ?<br><i>n</i> = ? | 2         |
|           |                                                          | 0.5 – 425                                                      |                           | Range          | Riverine                 | Qiangtang, Huangpu and Yellow River, China                                                                                                                                                  | <i>n</i> = 32                                | 3         |
|           |                                                          | 1.13 – 21.13                                                   |                           | Range          | Riverine                 | Tagus estuary, Portugal                                                                                                                                                                     | <i>n</i> = 15                                |           |
|           |                                                          | <3.1 – 29                                                      |                           | Range          | Riverine                 | Various rivers, Portugal                                                                                                                                                                    | <i>n</i> = 46                                |           |
|           |                                                          | <3.0 – 44.8<br><3.0 – 71.2                                     |                           | Range<br>Range | Riverine                 | River Deben, England<br>River Orwell, England                                                                                                                                               | <i>n</i> = 6<br><i>n</i> = 11                |           |
|           |                                                          | <b>0.2 mean d.s</b><br><b>0.12median d/s</b>                   |                           |                |                          |                                                                                                                                                                                             | <b><i>n</i>=172</b>                          | 4         |
| TBT       | Half – Life in Sediment                                  | 578                                                            | Days                      |                | Canal                    | Forth and Clyde Canal (Glasgow, UK)                                                                                                                                                         | Sediment extracted and spiked with TBT.      | 5         |
|           | BSCF to Biota<br>Clam ( <i>Ruditapes philippinarum</i> ) | 67.3<br>85.6<br>196.4<br>81.6<br>100.5<br>8.1<br>346.7<br>67.8 |                           | Mean           | Estuarine<br><br>Coastal | Site 1, Guadaianna estuary, (SW) Spain<br>Site 2<br>Site 3<br>Site 8, Huelva, (SW) Spain<br>Site 9, Bay of Cadiz, (SW) Spain<br>Site 10<br>Site 11<br>Site 13, Bay of Algeciras, (SW) Spain | 28 days exposure to contaminated sediments.  | 6         |
|           | Partitioning Values                                      | 3.9 – 4.9<br>3.64                                              | log $K_{ow}$<br>log $K_d$ | Mean           | Canal                    | Forth and Clyde Canal (Glasgow, UK)                                                                                                                                                         |                                              | 7         |

| Substance      | Input                                                                                                                                                                  | Value(s)                                                                                                                                                 | Units                 | Descriptive                   | Environment | Location                                                                                                                                                                                                                                                               | Details/Notes                                                                                        | Reference  |
|----------------|------------------------------------------------------------------------------------------------------------------------------------------------------------------------|----------------------------------------------------------------------------------------------------------------------------------------------------------|-----------------------|-------------------------------|-------------|------------------------------------------------------------------------------------------------------------------------------------------------------------------------------------------------------------------------------------------------------------------------|------------------------------------------------------------------------------------------------------|------------|
|                | Sediment Concentration<br><br>1ng/g =1 ppb = 2.43 ug/kg TBT<br><br>Tool predicts 0.15 ug/kg as TBT<br><br>This is                                                      | 1.5 (0.1 – 8.6)<br><br>153 (10)<br>573 (22)<br>340 (11)<br>171 (8)<br>81 (5)<br>57 (7)<br>48 (7)<br>390 (12)<br>17 (2)<br>258 (11)                       | ppb<br><br>ng Sn/g dw | Mean (Range)<br><br>Mean (SD) | Estuarine   | Tolka estuary (Dublin, Ireland)<br><br>Site 1, Guadianna estuary, (SW) Spain<br>Site 2<br>Site 3<br>Site 4, Huelva, (SW) Spain<br>Site 5<br>Site 8<br>Site 9, Bay of Cadiz, (SW) Spain<br>Site 11, Port of Babarte<br>Site 13, Bay of Algeciras, (SW) Spain<br>Site 14 | n = 14.<br>Surface sediment.                                                                         | 8<br><br>6 |
| Methyl-Mercury | Concentration (Point Source)<br>WWTP Primary effluent<br>WWTP Secondary effluent<br>WWTP Final effluent                                                                | 1.92 ± 0.90<br>2.76 ± 1.96<br>1.53 ± 0.93                                                                                                                | ng/L                  | Mean ± SD                     | Effluent    | Syracuse, New York, USA                                                                                                                                                                                                                                                | n = 12<br>n = 12<br>n = 12                                                                           | 9          |
|                | In-River Concentration                                                                                                                                                 | 0.191<br>0.102<br>0.33<br>0.15<br>0.18                                                                                                                   | ng/L                  | Median                        | Riverine    | Colusa Basin Drain, CA, USA<br>Mid-Sacramento River, CA, USA<br>Sacramento Slough, CA, USA<br>Sacramento River at Verona, CA, USA<br>Sacramento River at Freeport, CA, USA                                                                                             |                                                                                                      | 11         |
|                | Half – Life in Sediment                                                                                                                                                | 1.4 (0.2)                                                                                                                                                | Hours                 | Mean (SD)                     | Estuarine   | Saltmarsh, Portugal                                                                                                                                                                                                                                                    |                                                                                                      | 11         |
|                | BSCF to Biota                                                                                                                                                          |                                                                                                                                                          |                       |                               |             |                                                                                                                                                                                                                                                                        |                                                                                                      | 12         |
|                | Phytoplankton<br>pH < 4.0<br>pH 4.0 – 7.0<br>pH ~ 7.0<br>Zooplankton<br>pH < 4.0<br>pH 4.0 – 7.0<br>pH ~ 7.0<br>Benthic macroinvertebrates<br>pH < 4.0<br>pH 4.0 – 7.0 | 107.92 ± 148.4<br>82.99 ± 85.9<br>53.00 ± 51.4<br>125.68 ± 165.9<br>105.86 ± 126.9<br>68.51 ± 89.8<br>255.61 ± 345.8<br>305.48 ± 705.6<br>181.95 ± 263.7 |                       | Mean ± SD                     | Riverine    | Rio Madeira, Brazilian Amazon                                                                                                                                                                                                                                          | n = 54<br>n = 144<br>n = 162<br><br>n = 54<br>n = 144<br>n = 162<br><br>n = 54<br>n = 144<br>n = 162 |            |

| Substance | Input                             | Value(s)                                                                                               | Units              | Descriptive  | Environment                                                    | Location                                                                                                                                                                 | Details/Notes                                                                                | Reference |
|-----------|-----------------------------------|--------------------------------------------------------------------------------------------------------|--------------------|--------------|----------------------------------------------------------------|--------------------------------------------------------------------------------------------------------------------------------------------------------------------------|----------------------------------------------------------------------------------------------|-----------|
|           | pH ~ 7.0                          |                                                                                                        |                    | Mean         | Riverine                                                       | New York, USA                                                                                                                                                            |                                                                                              |           |
|           | <i>Invertebrate – detritivore</i> | 200<br>36.9                                                                                            |                    |              |                                                                |                                                                                                                                                                          | <i>n</i> = 5<br><i>n</i> = 11                                                                |           |
|           | Headwater stream                  |                                                                                                        |                    |              |                                                                |                                                                                                                                                                          |                                                                                              |           |
|           | Mid-order stream                  | 770                                                                                                    |                    |              |                                                                |                                                                                                                                                                          | <i>n</i> = 5                                                                                 |           |
|           | <i>Invertebrate – predator</i>    | 95                                                                                                     |                    |              |                                                                |                                                                                                                                                                          | <i>n</i> = 2                                                                                 |           |
|           | Headwater stream                  |                                                                                                        |                    |              |                                                                |                                                                                                                                                                          |                                                                                              |           |
|           | Mid-order stream                  | 1140                                                                                                   |                    |              |                                                                |                                                                                                                                                                          | <i>n</i> = 5                                                                                 |           |
|           | <i>Fish – forage</i>              | 342                                                                                                    |                    |              |                                                                |                                                                                                                                                                          | <i>n</i> = 25                                                                                |           |
|           | Headwater stream                  |                                                                                                        |                    |              |                                                                |                                                                                                                                                                          |                                                                                              |           |
|           | Mid-order stream                  | 2125                                                                                                   |                    |              |                                                                |                                                                                                                                                                          | <i>n</i> = 15                                                                                |           |
|           | <i>Fish – predator</i>            | 513                                                                                                    |                    |              |                                                                |                                                                                                                                                                          | <i>n</i> = 15                                                                                |           |
|           | Headwater stream                  |                                                                                                        |                    |              |                                                                |                                                                                                                                                                          |                                                                                              |           |
|           | Mid-order stream                  |                                                                                                        |                    |              |                                                                |                                                                                                                                                                          |                                                                                              |           |
|           | Partitioning Values               | <2.53 – 4.15                                                                                           | log K <sub>d</sub> | Median       | Riverine                                                       | OR, WI, FL, USA                                                                                                                                                          | 8 streams across 3 USA states.                                                               | 13        |
|           |                                   | 6.46                                                                                                   |                    |              |                                                                | E Anglia                                                                                                                                                                 |                                                                                              | 14        |
|           |                                   |                                                                                                        |                    |              |                                                                |                                                                                                                                                                          |                                                                                              |           |
|           |                                   |                                                                                                        |                    |              |                                                                |                                                                                                                                                                          |                                                                                              |           |
|           |                                   |                                                                                                        |                    |              |                                                                |                                                                                                                                                                          |                                                                                              |           |
|           |                                   |                                                                                                        |                    |              |                                                                |                                                                                                                                                                          |                                                                                              |           |
|           |                                   |                                                                                                        |                    |              |                                                                |                                                                                                                                                                          |                                                                                              |           |
|           | Sediment Concentration            | 19.1 (8.9 – 28.6)<br>5.7 (2.9 - 10.6)<br>19.7 (16.9 – 23.5)<br>12.1 (6.2 – 20.5)<br>18.4 (15.7 – 21.9) | µg/kg              | Mean (Range) | Lacustrine<br>Riverine<br>Lacustrine<br>Riverine<br>Lacustrine | Surlingham Broad (Norfolk, UK)<br>Adjacent River Site (Norfolk, UK)<br>Rockland Broad (Norfolk, UK)<br>Adjacent River Site (Norfolk, UK)<br>Wheatfen Broad (Norfolk, UK) | <i>n</i> = 8. Surficial sediment (0-2 cm) concentration s.                                   | 15        |
|           |                                   | 0.27<br>0.36<br>0.52<br>2.84                                                                           | ng/g               | Mean         | Riverine                                                       | Putah Creek, CA<br>Cottonwood Creek, CA<br>Colusa Basin Drain<br>Sacramento Slough, CA                                                                                   | Sediment collected by selecting a 100-m reach of river and collecting material from sediment | 10        |
|           |                                   |                                                                                                        |                    |              |                                                                |                                                                                                                                                                          |                                                                                              |           |
|           |                                   |                                                                                                        |                    |              |                                                                |                                                                                                                                                                          |                                                                                              |           |
|           |                                   |                                                                                                        |                    |              |                                                                |                                                                                                                                                                          |                                                                                              |           |
|           |                                   |                                                                                                        |                    |              |                                                                |                                                                                                                                                                          |                                                                                              |           |
|           |                                   |                                                                                                        |                    |              |                                                                |                                                                                                                                                                          |                                                                                              |           |
|           |                                   |                                                                                                        |                    |              |                                                                |                                                                                                                                                                          |                                                                                              |           |
|           |                                   |                                                                                                        |                    |              |                                                                |                                                                                                                                                                          |                                                                                              |           |
|           |                                   |                                                                                                        |                    |              |                                                                |                                                                                                                                                                          |                                                                                              |           |



| Substance               | Input                          | Value(s)                                                                                                                                                                                                                                                                 | Units | Descriptive                                           | Environment | Location                                                | Details/Notes                                                                                     | Reference |
|-------------------------|--------------------------------|--------------------------------------------------------------------------------------------------------------------------------------------------------------------------------------------------------------------------------------------------------------------------|-------|-------------------------------------------------------|-------------|---------------------------------------------------------|---------------------------------------------------------------------------------------------------|-----------|
|                         |                                |                                                                                                                                                                                                                                                                          |       |                                                       |             |                                                         | deposition zones.                                                                                 |           |
| <b>PCBs</b><br>[number] | Concentration (Point Source)   | [101] 397 (326)<br>[105] 63 (60)<br>[118] 229 (252)<br>[128] 25 (50)<br>[138] 357 (205)<br>[153] 164 (39)<br>[170] 37 (45)<br>[180] 155 (87)<br>[183] 21 (33)                                                                                                            | pg/L  | Mean (SD)                                             | Effluent    | MUC WWTP, Quebec, Canada                                | n = 6. The MUC wastewater treatment plant typically treats an average effluent flow of 19.8 m³/s. | 16        |
|                         | In-River Concentration         | [total] 123 (51) [U/S]<br>[total] 221 (60) [Outfall]<br>[total] 189 (94) [0.3km D/S]<br>[total] 171 (107) [4km D/S]<br>[total] 161 (70) [8.5km D/S]                                                                                                                      | pg/L  | Mean (SD) [Location or distance from WWTWs discharge] | Riverine    | St Lawrence River, Quebec, Canada                       |                                                                                                   | 16        |
|                         | Half – Life<br>Water; Sediment | [28] 1,450; 26,000<br>[52] 30,000; 87,600<br>[77] 30,000; 87,600<br>[101] 60,000; 87,600<br>[105] 60,000; 87,600<br>[118] 60,000; 60,000<br>[126] 60,000; 87,600<br>[138] 120,000; 165,000<br>[153] 120,000; 165,000<br>[169] 120,000; 165,000<br>[180] 240,000; 333,000 | Hours |                                                       | Maritime    | Baltic Sea                                              |                                                                                                   | 17        |
|                         | BSCF to Biota<br>Eel; Pike     | [28/31] 0.16; 1.98<br>[52] 3.92; 2.54<br>[99/113] 1.44; 3.77<br>[101/90] 1.49; 2.92<br>[105] 2.55; 7.16<br>[118] 2.16; 4.77<br>[138/164] 4.61; 7.38                                                                                                                      |       | Mean                                                  | Riverine    | River Severn at Stourport-on-Severn, Worcestershire, UK | n = 5.                                                                                            | 18        |

| Substance | Input                                   | Value(s)                                                                                                                                                                                                                         | Units                                                     | Descriptive                                              | Environment                                               | Location                                                                                                                                                                                                                                           | Details/Notes                                                    | Reference                                    |
|-----------|-----------------------------------------|----------------------------------------------------------------------------------------------------------------------------------------------------------------------------------------------------------------------------------|-----------------------------------------------------------|----------------------------------------------------------|-----------------------------------------------------------|----------------------------------------------------------------------------------------------------------------------------------------------------------------------------------------------------------------------------------------------------|------------------------------------------------------------------|----------------------------------------------|
|           | White Sucker                            | [153] 10.1; 9.84<br>[180] 1.93; 12.2<br><br>[total] 11<br>[total] 5.7<br>[total] 5.7<br>[total] 4.4<br>[total] 3.3<br>[total] 2.4<br>[total] 2.0<br>[total] 1.8<br>[total] 1.8<br>[total] 1.1<br>[total] 21<br>[total] 2.1 - 3.3 |                                                           | Mean                                                     | Riverine                                                  | Conestoga River, PA, USA<br>Quinebaug River, MA, USA<br>Codorus Creek, PA, USA<br>Lind Coulee Nr. Moses Lake, WA, USA<br>East Branch Housatonic, MA, USA<br>Quinnipac River, CT, USA<br>Winchester Wasteway, WA, USA<br>Mattabasset River, CT, USA |                                                                  | 19                                           |
|           | Sculpins                                |                                                                                                                                                                                                                                  |                                                           | Range                                                    |                                                           | Qunittapahilla Creek, PA, USA<br>Salt Creek, IN, USA<br>White River, IN, USA                                                                                                                                                                       |                                                                  |                                              |
|           | Bivalve ( <i>Corbicula manilensis</i> ) |                                                                                                                                                                                                                                  |                                                           |                                                          |                                                           |                                                                                                                                                                                                                                                    |                                                                  |                                              |
|           | Partitioning Values                     | [28] 5.31<br>[31] 5.31<br>[52] 5.91<br>[77] 5.75<br>[83] 6.04<br>[87] 6.07<br>[95] 6.16<br>[101] 6.14<br>[136] 6.42<br>[138] 6.49<br>[153] 6.57                                                                                  | log K <sub>oc</sub>                                       | Mean                                                     | Riverine                                                  | Hudson River, USA                                                                                                                                                                                                                                  | Theoretical values of log K <sub>oc</sub> .                      | 20                                           |
|           | Sediment Concentration                  | [28/31] 620<br>[52] 200<br>[99/113] 140<br>[101/90] 320<br>[105] 110<br>[118] 220<br>[138/164] 170<br>[153] 83<br>[180] 160<br><br>[28]<br>2.51 (0-10cm)<br>2.65 (10-20cm)<br>5.65 (20-30cm)                                     | ng/kg dw<br><br><br><br><br><br><br><br><br><br><br>µg/kg | Mean<br><br><br><br><br><br><br><br><br><br>Mean (Depth) | Riverine<br><br><br><br><br><br><br><br><br><br>Estuarine | River Severn at Stourport-on-Severn (Worcestershire, UK)<br><br><br><br><br><br><br><br><br><br>Site M34, Mersey (Inner) Estuary, UK                                                                                                               | Samples taken to a depth of 5 cm along a 200 m stretch of river. | 18<br><br><br><br><br><br><br><br><br><br>21 |

| Substance | Input | Value(s)                                                                                                                                                                                                                                                                                                                                                                                                                                                                                                                                                                                                                                                                                                                        | Units | Descriptive | Environment | Location                                                                                                                                                                   | Details/Notes                                                                                                                                                                                       | Reference |
|-----------|-------|---------------------------------------------------------------------------------------------------------------------------------------------------------------------------------------------------------------------------------------------------------------------------------------------------------------------------------------------------------------------------------------------------------------------------------------------------------------------------------------------------------------------------------------------------------------------------------------------------------------------------------------------------------------------------------------------------------------------------------|-------|-------------|-------------|----------------------------------------------------------------------------------------------------------------------------------------------------------------------------|-----------------------------------------------------------------------------------------------------------------------------------------------------------------------------------------------------|-----------|
|           |       | 8.31 (30-40cm)<br>12.2 (40-50cm)<br>11.7 (50-60cm)<br>1.63 (60-70cm)<br><0.1 (70-80cm)<br><0.1 (80-90cm)<br><br>3.35 (0-10cm)<br>3.21 (10-20cm)<br>2.95 (20-30cm)<br>2.96 (30-40cm)<br>3.15 (40-50cm)<br>1.59 (50-60cm)<br>3.61 (60-70cm)<br><br><b>[52]</b><br>2.07 (0-10cm)<br>1.46 (10-20cm)<br>2.91 (20-30cm)<br>4.86 (30-40cm)<br>4.98 (40-50cm)<br>6.04 (50-60cm)<br>1.29 (60-70cm)<br><0.1 (70-80cm)<br><0.1 (80-90cm)<br><br>1.3 (0-10cm)<br>1.26 (10-20cm)<br>1.29 (20-30cm)<br>1.57 (30-40cm)<br>1.7 (40-50cm)<br>1.03 (50-60cm)<br>1.55 (60-70cm)<br><br><b>[101]</b><br>2.39 (0-10cm)<br>2.17 (10-20cm)<br>4.29 (20-30cm)<br>5.38 (30-40cm)<br>5.90 (40-50cm)<br>7.67 (50-60cm)<br>0.45 (60-70cm)<br><0.1 (70-80cm) |       |             |             | Site M165, Mersey (Inner) Estuary, UK<br><br>Site M34, Mersey (Inner) Estuary, UK<br><br>Site M165, Mersey (Inner) Estuary, UK<br><br>Site M34, Mersey (Inner) Estuary, UK | Two sites chosen to report here as full sediment profile was analysed. Reference also contains further sites with various depths measured. Sampling was carried out from May 2000 to November 2002. |           |

[illegible]

[illegible]

| Substance    | Input                                           | Value(s)                                                                                              | Units                 | Descriptive                                                  | Environment                                       | Location                                                                                                                                        | Details/Notes                                                    | Reference |
|--------------|-------------------------------------------------|-------------------------------------------------------------------------------------------------------|-----------------------|--------------------------------------------------------------|---------------------------------------------------|-------------------------------------------------------------------------------------------------------------------------------------------------|------------------------------------------------------------------|-----------|
|              |                                                 |                                                                                                       |                       |                                                              |                                                   | Site M165, Mersey (Inner) Estuary, UK                                                                                                           |                                                                  |           |
| <b>HBCDD</b> | Concentration (Point Source)                    | <3.9<br>4.9 (7.6)                                                                                     | µg/kg                 | Mean (SD)                                                    |                                                   | SE England<br>Netherlands                                                                                                                       | n = 5.                                                           | 22        |
|              | In-River Concentration                          | 2.64E-04<br>9.55E-04<br>5.61E-04<br>2.29E-04<br>1.40E-03<br><br><b>0.0027 (0.0030) d/s<br/>0.0016</b> | (query these)<br>µg/L | Mean<br>Mean<br>Mean<br>Mean<br>Mean<br><br><b>Mean (SD)</b> | Riverine                                          | River Arun, England<br>River Erewash, England<br>River Ouzel, England<br>River Team, England<br>River Alt, England<br><br><b>Rivers England</b> | N = 1<br>N = 12<br>N = 15<br>N = 9<br>N = 17<br><br><b>N=172</b> | 4         |
|              | Half – Life in Sediment<br>Aerobic<br>Anaerobic | 101<br>66                                                                                             | Days                  |                                                              |                                                   |                                                                                                                                                 |                                                                  | 23        |
|              | BSCF to Biota<br><i>Bleak</i><br><i>Barbel</i>  | 0.10 – 0.68<br>0.10 – 1.44<br>0.23 – 1.23<br>0.14 – 0.47                                              |                       | Range                                                        | Riverine                                          | Cinca River, Spain                                                                                                                              |                                                                  | 24        |
|              | Partitioning Values                             | 7.74<br>6.72                                                                                          |                       | log K <sub>ow</sub><br>log K <sub>oc</sub>                   |                                                   |                                                                                                                                                 | Values modelled with EPI suite (US EPA)                          | 25        |
|              | Sediment Concentration                          | 60 (223)<br>10 (25)<br>3.3 (5.2)<br>199 (364)                                                         | µg/kg                 | Mean (SD)                                                    | Riverine<br>Estuarine<br><br>Estuarine + Riverine | Scheldt Basin, Netherlands<br>Western Scheldt, Netherlands<br>Dublin Bay, Ireland<br>6 England Rivers                                           | n = 19.                                                          | 22        |

| Substance    | Input                                                                              | Value(s)                                                                                                                                      | Units | Descriptive                     | Environment                               | Location                                                                      | Details/Notes                                                                     | Reference   |
|--------------|------------------------------------------------------------------------------------|-----------------------------------------------------------------------------------------------------------------------------------------------|-------|---------------------------------|-------------------------------------------|-------------------------------------------------------------------------------|-----------------------------------------------------------------------------------|-------------|
|              |                                                                                    | Nd - 514                                                                                                                                      | ng/g  | Range                           | Riverine                                  | Cinca River, Spain                                                            | Samples collected up and downstream of industrialized town draining to the river. | 26          |
| Cypermethrin | Concentration (Point Source)                                                       | 269.1<br>568.7<br>79.16<br><br><b>0.3 (0.9)</b><br><br><b>0.14 (0.31) mean (sd)</b><br><b>0.064 median</b>                                    | ng/L  | Mean                            | Effluent<br><br>Effluent<br><br>River d/s | El Gallo WWTWs, Mexico<br>El Naranjo WWTWs, Mexico<br>El Sauzal WWTWs, Mexico | 24hr composite samples.                                                           | 27<br><br>4 |
|              | In-River Concentration                                                             | 5.8 - 30.4 [2008]<br>0.73 – 57.2 [2009]                                                                                                       | ng/L  | Range [Year]                    | Riverine                                  | Ebro Delta River, (NE) Spain                                                  | n = 12.                                                                           | 28          |
|              | Half – Life in Sediment                                                            | 6-20                                                                                                                                          | days  | Range                           | Estuarine + Coastal                       | Punta Banda Estuary and Todos Santos Bay, Mexico                              |                                                                                   | 27          |
|              | Hydrolysis Aerobic                                                                 | 1.9 – 619<br>6 - 20                                                                                                                           | days  | Range                           | Riverine                                  | Ebro Delta River, (NE) Spain                                                  |                                                                                   | 28          |
|              | BSCF to Biota<br><i>Daphnia magna</i><br><br><br><br><br><i>Chironomus tentans</i> | 0.31 (0.28-0.34) [1]<br>0.14 (0.12-0.16) [3]<br>0.08 (0.06-0.10) [13]<br>0.63 (0.5-0.76) [1]<br>0.19 (0.17-0.21) [3]<br>0.08 (0.06-0.10) [13] |       | Mean (95% CL)<br>[OC content %] | Natural Sediments                         | Mississippi, Florissant, Duluth, USA                                          |                                                                                   | 29          |

| Substance | Input                        | Value(s)                                                                                                                                                                                                           | Units   | Descriptive                                                        | Environment       | Location                                                                                                                                                                                                                                                                                                                                                                               | Details/Notes             | Reference                                                |
|-----------|------------------------------|--------------------------------------------------------------------------------------------------------------------------------------------------------------------------------------------------------------------|---------|--------------------------------------------------------------------|-------------------|----------------------------------------------------------------------------------------------------------------------------------------------------------------------------------------------------------------------------------------------------------------------------------------------------------------------------------------------------------------------------------------|---------------------------|----------------------------------------------------------|
|           | Partitioning Values          | 2,360 [1]<br>15,700 [3]<br>23,600 [13]<br>238,000 (16) [1]<br>502,000 (5) [3]<br>177,000 (13) [13]                                                                                                                 | Mean    | K <sub>ds</sub><br>[OC content %]                                  | Natural Sediments | Mississippi, Florissant, Duluth, USA                                                                                                                                                                                                                                                                                                                                                   |                           | 29                                                       |
|           |                              | 5 – 6.3                                                                                                                                                                                                            | Range   | K <sub>oc</sub> (CoV)<br>[OC content %]<br><br>log K <sub>oc</sub> | Riverine          | Ebro Delta River, (NE) Spain                                                                                                                                                                                                                                                                                                                                                           |                           | 28)                                                      |
|           |                              | 0.24 (0.30)<br>0.46 (1.47)                                                                                                                                                                                         | ng g/dw | Mean (SD)                                                          | Estuarine Coastal | Punta Banda Estuary, Mexico<br>Todos Santos Bay, Mexico                                                                                                                                                                                                                                                                                                                                | n = 19. Top 2cm sediment. | 27                                                       |
|           | Sediment Concentration       | 8.3 – 71.9 (Jun 2009)<br>0.13 – 2.92 (Oct 2009)                                                                                                                                                                    | ng/g    | Range [Date]                                                       | Riverine          | Ebro Delta River, (NE) Spain                                                                                                                                                                                                                                                                                                                                                           | n = 13.<br><br>n = 8.     | 28                                                       |
| PFOS      | Concentration (Point Source) | 5.5 (0.6)<br>4.7 (0.8)<br>2.5 (0.7)<br>5.8 (0.5)<br>82.2 (6.5)<br>2.1 (0.4)<br>< 0.06<br>< 0.06<br>0.5 (0.1)<br><br>45 [Apr 2005]<br>140 [Jul 2005]<br>31 [Mar 2006]<br>30 [13 Jul 2005]<br>12 [27 Jul 2005]<br>12 | ng/L    | Mean (SD)<br><br><br><br><br><br><br><br><br>Mean [Date]           | Effluent          | WWTW a, River Elbe, Germany<br>WWTW b, River Elbe, Germany<br>WWTW c, River Elbe, Germany<br>WWTW d, River Elbe, Germany<br>WWTW e, River Elbe, Germany<br>WWTW f, River Elbe, Germany<br>WWTW g, River Elbe, Germany<br>WWTW h, River Elbe, Germany<br>WWTW i, River Elbe, Germany<br><br>WWTW a, Bayreuth, Germany<br><br>WWTW b, Bayreuth, Germany<br><br>WWTW c, Bayreuth, Germany |                           | 30<br><br><br><br><br><br><br><br><br><br><br><br><br>31 |



| Substance | Input                                                                           | Value(s)                                                                                                                                                                                                                                                                                                                                                                              | Units | Descriptive                                  | Environment | Location                                                                                                                                                                                                                                                                                                                                                                                                                                                                            | Details/Notes                        | Reference |
|-----------|---------------------------------------------------------------------------------|---------------------------------------------------------------------------------------------------------------------------------------------------------------------------------------------------------------------------------------------------------------------------------------------------------------------------------------------------------------------------------------|-------|----------------------------------------------|-------------|-------------------------------------------------------------------------------------------------------------------------------------------------------------------------------------------------------------------------------------------------------------------------------------------------------------------------------------------------------------------------------------------------------------------------------------------------------------------------------------|--------------------------------------|-----------|
|           | In-River Concentration                                                          | 1.2 (0.2)<br>2.1 (0.03)<br>1.9 (0.04)<br>2.2 (0.1)<br>2 (0.1)<br>2.9 (0.3)<br>1.5 (0.7)<br>0.6 (0.1)<br>0.5 (0.3)<br>1.6 (1.1)<br>2.1 (0.2)<br>2 (0.1)<br>1.6 (0.0003)<br>1.2 (0.03)<br>1 (0.2)<br><br>1.7 (0.3)<br>[1km U/S]<br>16 (0.3)<br>[0.1km D/S]<br>14 (0.5)<br>[0.5km D/S]<br>11 (0.2)<br>[1km D/S]<br><br>17.4 (2.2)<br><br><b>6.6 (9.2) mean (Sd)</b><br><b>4.0 median</b> | ng/L  | Mean (SD)                                    | Riverine    | Site 1, River Elbe, Germany<br>Site 2, River Elbe, Germany<br>Site 3, River Elbe, Germany<br>Site 4, River Elbe, Germany<br>Site 5, River Elbe, Germany<br>Site 6, River Elbe, Germany<br>Site 7, River Elbe, Germany<br>Site 8, River Elbe, Germany<br>Site 9, River Elbe, Germany<br>Site 10, River Elbe, Germany<br>Site 11, River Elbe, Germany<br>Site 12, River Elbe, Germany<br>Site 13, River Elbe, Germany<br>Site 14, River Elbe, Germany<br>Site 15, River Elbe, Germany |                                      | 30        |
|           |                                                                                 |                                                                                                                                                                                                                                                                                                                                                                                       |       | Mean (SD)<br>[Distance from WWTWs discharge] | Estuarine   |                                                                                                                                                                                                                                                                                                                                                                                                                                                                                     |                                      |           |
|           |                                                                                 |                                                                                                                                                                                                                                                                                                                                                                                       |       | Mean (SD)                                    | Riverine    | Rotor Main river, Bayreuth, Germany                                                                                                                                                                                                                                                                                                                                                                                                                                                 | <i>n</i> = 3.                        | 32        |
|           |                                                                                 |                                                                                                                                                                                                                                                                                                                                                                                       |       |                                              | Riverine    | Orge River, Paris, France                                                                                                                                                                                                                                                                                                                                                                                                                                                           | <i>n</i> = 3<br><b>n-172</b>         | 33<br>4   |
|           | Half – Life in Sediment                                                         | > 41 (in water)                                                                                                                                                                                                                                                                                                                                                                       | Years |                                              |             |                                                                                                                                                                                                                                                                                                                                                                                                                                                                                     | Could not find half-life in sediment | 34        |
|           | BSCF to Biota<br>European Chub:<br>Plasma<br>Liver<br>Gills<br>Gonads<br>Muscle | 1.5 (0.1)<br>0.6 (0.2)<br>0.3 (0.1)<br>0.2 (0.1)<br>-0.3 (0.2)                                                                                                                                                                                                                                                                                                                        |       | Mean (SD)                                    | Riverine    | Orge River, Paris, France                                                                                                                                                                                                                                                                                                                                                                                                                                                           | <i>n</i> = 3.                        | 33        |

| Substance | Input                        | Value(s)     | Units     | Descriptive                     | Environment | Location                                                  | Details/Notes                                                  | Reference |
|-----------|------------------------------|--------------|-----------|---------------------------------|-------------|-----------------------------------------------------------|----------------------------------------------------------------|-----------|
|           | Partitioning Values          | 7.42         | Mean      | log K <sub>d</sub>              | Riverine    | Lake Michigan, USA                                        |                                                                | 35        |
|           |                              | 2.8          |           | log K <sub>oc</sub>             |             |                                                           |                                                                |           |
|           | Sediment Concentration       | 2.4 (0.2)    | Mean (SD) | log K <sub>d</sub>              | Riverine    | Orge River, Paris, France                                 |                                                                | 33        |
|           |                              | 3.7 (0.2)    |           | log K <sub>oc</sub>             |             |                                                           |                                                                |           |
|           | Sediment Concentration       | 105 (85)     | Ng/kg dw  | Mean (SD)                       | Riverine    | Rotor Main river, Bayreuth, Germany                       | n = 3.                                                         | 32        |
|           |                              | [0.1km U/S]  |           | [Distance from WWTWs discharge] |             |                                                           |                                                                |           |
|           |                              | 280 (120)    |           |                                 |             |                                                           |                                                                |           |
|           |                              | [0.05km D/S] |           |                                 |             |                                                           |                                                                |           |
| PFOA      | Concentration (Point Source) | 250 (150)    |           |                                 |             |                                                           |                                                                |           |
|           |                              | [0.5km D/S]  |           |                                 |             |                                                           |                                                                |           |
|           |                              | 200 (90)     |           |                                 |             |                                                           |                                                                |           |
|           |                              | [1km D/S]    |           |                                 |             |                                                           |                                                                |           |
|           |                              | 4.3 (0.3)    |           | Mean (SD)                       | Riverine    | Orge River, Paris, France                                 | n = 3.<br>Surface sediment, 0-2cm.                             |           |
|           | Concentration (Point Source) | 239          | ng/L      | Mean                            | Effluent    | New York State, USA                                       | Measured in effluent waters of 2 activated sludge WWTW plants. | 36        |
|           |                              | 235          |           |                                 |             |                                                           |                                                                |           |
|           |                              | 663          |           |                                 |             |                                                           |                                                                |           |
|           | Concentration (Point Source) | 697          |           |                                 |             |                                                           |                                                                |           |
|           |                              | 165          |           |                                 |             |                                                           |                                                                |           |
|           |                              | 67           |           |                                 |             |                                                           |                                                                |           |
|           |                              | 12-185       | ng/L      | Range                           | Effluent    | California, USA                                           |                                                                | 37        |
|           | Concentration (Point Source) | 0.40-926     | ng/L      | Range                           | Effluent    | Germany                                                   | Measured in reclaimed wastewater from 4 WWTW plants.           | 38        |
|           |                              | 145          | ng/L      | Mean                            |             |                                                           |                                                                |           |
|           |                              |              |           |                                 |             |                                                           |                                                                |           |
|           |                              |              |           |                                 |             |                                                           | Measured in landfill effluent (n = 20)                         |           |
|           | In-River Concentration       | 30.7         | ng/L      | Median                          | Riverine    | Japan<br>England (London)<br>Sri Lanka<br>China<br>Turkey | n = 233                                                        | 40        |
|           |                              | 10.6         |           |                                 |             |                                                           | n = 13                                                         |           |
|           |                              | 10.5         |           |                                 |             |                                                           | n = 6                                                          |           |
|           |                              | 7.4          |           |                                 |             |                                                           | n = 13                                                         |           |
|           | In-River Concentration       | 5.7          |           |                                 |             |                                                           | n = 2                                                          |           |
|           |                              |              |           |                                 |             |                                                           |                                                                |           |

| Substance | Input                                                                     | Value(s)                                        | Units | Descriptive                                                               | Environment              | Location                                                        | Details/Notes                                                                                                                                               | Reference    |
|-----------|---------------------------------------------------------------------------|-------------------------------------------------|-------|---------------------------------------------------------------------------|--------------------------|-----------------------------------------------------------------|-------------------------------------------------------------------------------------------------------------------------------------------------------------|--------------|
|           |                                                                           | 5.6<br>4.8<br>3.8<br>2.3<br>1.2<br>0.7          |       |                                                                           |                          | Singapore<br>Malaysia<br>Laos<br>Thailand<br>Ireland<br>Vietnam | <i>n</i> = 49<br><i>n</i> = 63<br><i>n</i> = 1<br><i>n</i> = 125<br><i>n</i> = 1<br><i>n</i> = 15                                                           |              |
|           |                                                                           | 23                                              | ng/L  | Mean                                                                      | Riverine                 | River Thames, England                                           |                                                                                                                                                             | 41           |
|           |                                                                           | 100                                             | ng/L  | Average                                                                   | Riverine                 | River Wyre, England                                             |                                                                                                                                                             | 42           |
|           |                                                                           | <b>4.9 (4.6) mean (Sd)</b><br><b>3.6 median</b> |       |                                                                           | <b>River d/s</b>         |                                                                 | <b>N=172</b>                                                                                                                                                | 4            |
|           | Half – Life in Sediment                                                   | No measurable half-lives available              |       |                                                                           | Freshwater and Estuarine |                                                                 | Due to the high persistence of PFOA, no half-lives in sediment are available.                                                                               | 43           |
|           | BSCF to Biota<br>Freshwater oligochaete,<br><i>Lumbriculus variegatus</i> | 33 ± 12<br><br>95 ± 12<br><br>94 ± 12           |       | Measured value ± SD<br><br>Measured value ± SD<br><br>Measured value ± SD | Riverine                 | California, USA                                                 | Lipid-normalised BSAF value (estimated).<br><br>Lipid-normalised measured values after 56 days for 2 sediment samples taken downstream of 2 different WWTW. | 44           |
|           | Partitioning Values                                                       | 2.3 – 2.6<br><br>2.69                           |       | Log (Range) $k_{oc}$<br><br>Log $k_{ow}$                                  |                          |                                                                 | Values determined experimentally in water containing suspended                                                                                              | 45<br><br>46 |

| Substance               | Input                        | Value(s)                                                                                                  | Units    | Descriptive       | Environment                                  | Location                                                                                                           | Details/Notes                                                                                                                                       | Reference |
|-------------------------|------------------------------|-----------------------------------------------------------------------------------------------------------|----------|-------------------|----------------------------------------------|--------------------------------------------------------------------------------------------------------------------|-----------------------------------------------------------------------------------------------------------------------------------------------------|-----------|
|                         |                              | 0.5                                                                                                       |          | pKa               |                                              |                                                                                                                    | solids<br><br>Calculated using Advanced Chemistry Development (ACD/Labs) Software at pH 7 and 25°C<br><br>Values determined experimentally in water | 43        |
|                         | Sediment Concentration       | 1.48                                                                                                      | µg/kg dw | Mean              | Riverine                                     | Danube River, Austria                                                                                              | Samples taken from Danube river banks                                                                                                               | 47        |
|                         |                              | 27<br>70<br>85<br>50                                                                                      | ng/kg dw | Mean              | Riverine                                     | Roter Main River, Germany<br>Taken at locations relative to a WWTP                                                 | 0.1 km upstream<br>0.05 km downstream<br>0.5 km downstream<br>1 km downstream                                                                       | 31        |
|                         |                              | 0.3<br>5                                                                                                  | ng/g     | Median<br>Mean    | Various                                      | China, Japan, Austria, Germany, USA                                                                                | <i>n</i> = 74                                                                                                                                       | 48        |
| <b>Benzo (a) pyrene</b> | Concentration (Point Source) | 0.0066                                                                                                    | µg/L     | 95%ile of average | Effluent                                     | UK                                                                                                                 | <i>n</i> = 162<br>WWTW final effluent                                                                                                               | 49        |
|                         | In-River Concentration       | 4.79E-03<br>0.023<br>0.017<br>0.012<br>0.036<br><br><b>0.016 (0.015) mean (Sd)</b><br><b>0.012 median</b> | µg/L     | Average           | Riverine<br><br><br><br><br><b>River d/s</b> | River Arun, England<br>River Erewash, England<br>River Ouzel, England<br>River Team, England<br>River Alt, England | <i>n</i> = 18<br><i>n</i> = 11<br><i>n</i> = 17<br><i>n</i> = 11<br><i>n</i> = 21                                                                   | 4         |

| Substance    | Input                                                                              | Value(s)                                                                                                                                                                                                                                                               | Units    | Descriptive                                       | Environment | Location                   | Details/Notes  | Reference |
|--------------|------------------------------------------------------------------------------------|------------------------------------------------------------------------------------------------------------------------------------------------------------------------------------------------------------------------------------------------------------------------|----------|---------------------------------------------------|-------------|----------------------------|----------------|-----------|
|              | Half – Life in Sediment                                                            | 17,000                                                                                                                                                                                                                                                                 | Hours    | Estimated                                         | Lacustrine  | Quebec, Canada             |                | 50        |
|              | BSCF to Biota<br>Freshwater tubificid oligochaete ( <i>Ilyodrilus templetoni</i> ) | 1.33 ± 0.06<br>1.34 ± 0.11                                                                                                                                                                                                                                             |          | Mean ± SD                                         | Riverine    | California, USA            | n = 3<br>n = 3 | 51        |
|              | Partitioning Values                                                                | 6.24<br>6.04                                                                                                                                                                                                                                                           |          | Log K <sub>oc</sub> (Avg.)<br>Log K <sub>ow</sub> |             |                            |                | 52        |
|              | Sediment Concentration<br>Depth of sample (cm):                                    | 107<br>50–60 86.7<br>60–70 138<br>70–80 80.8<br>50–60 76.3<br>60–70 218<br>90–100 315<br>0–10 201<br>10–20 144<br>20–30 301<br>40–50 289<br>50–60 251<br>60–70 227<br>70–80 332<br>90–100 368<br>0–10 348<br>10–20 440<br>20–30 350<br>30–40 363<br>40–50 332<br>50–60 | µg/kg dw | Measured concentration                            | Estuarine   | Mersey Estuary, NW England |                | 53        |
|              |                                                                                    |                                                                                                                                                                                                                                                                        |          |                                                   |             |                            |                |           |
| Fluroanthene | Concentration (Point Source)<br>WWTW Effluent                                      | 0.0067<br>0.1                                                                                                                                                                                                                                                          | µg/L     | Median<br>Maximum                                 | Effluent    | Lake Champlain Basin, USA  | n = 6          | 54        |
|              | Urban Stream Stormflow                                                             | 0.071<br>0.16                                                                                                                                                                                                                                                          | µg/L     | Median<br>Maximum                                 |             |                            | n = 5          |           |
|              | CSO                                                                                | 0.067 – 0.082                                                                                                                                                                                                                                                          | µg/L     | Range                                             |             |                            | n = 2          |           |
|              | In-River Concentration                                                             | 14 - 240                                                                                                                                                                                                                                                               | ng/L     | Range                                             | Riverine    | Humber Estuary, UK         | Range          | 55        |

| Substance | Input                                                                                                            | Value(s)                              | Units | Descriptive | Environment | Location                                               | Details/Notes                                                                            | Reference |
|-----------|------------------------------------------------------------------------------------------------------------------|---------------------------------------|-------|-------------|-------------|--------------------------------------------------------|------------------------------------------------------------------------------------------|-----------|
|           |                                                                                                                  | 0.1 ± 0.16                            | µg/L  | Mean ± SD   | Various     | Europe                                                 | across 6 rivers                                                                          | 56        |
|           |                                                                                                                  | 22.1<br>4.07<br>0.858<br>0.711        | ng/L  | Mean        | Riverine    | USA<br><i>Elizabeth River</i><br><br><i>York River</i> | Dissolved fraction                                                                       |           |
|           |                                                                                                                  | 0.032 (0.037) mean sd<br>0.025 median |       |             | River d/s   |                                                        | Dissolved fraction<br>Particulate Fraction<br>Dissolved fraction<br>Particulate Fraction |           |
|           |                                                                                                                  |                                       |       |             |             |                                                        |                                                                                          |           |
|           | Half – Life in Sediment                                                                                          | 1.14                                  | Years |             | Estuarine   | Tamar Estuary, UK                                      |                                                                                          | 58        |
|           | Depth of sample (m):<br>0<br>10<br>50<br>100<br>150                                                              | 95.5<br>100<br>112<br>125<br>136      | Days  |             | Marine      | Gulf of Mexico                                         | Determined experimentally at 25°C                                                        | 59        |
|           | BSCF to Biota<br>Freshwater Amphipod ( <i>Diporeia</i> sp.)<br>Sediment concentration (nmol/g dw):<br>0.1<br>688 | 0.107<br>0.424                        |       | Mean        | Lacustrine  | Lake Michigan, USA                                     | <i>n</i> = 3                                                                             | 60        |
|           | Freshwater Amphipod ( <i>Hyalella asteca</i> )<br>Sediment concentration (nmol/g dw):<br>0.1<br>136              | 0.045<br>0.236                        |       |             |             |                                                        | <i>n</i> = 3                                                                             |           |
|           | Benthic copepod                                                                                                  |                                       |       |             | Estuarine   | Louisiana, USA                                         |                                                                                          | 61        |

| Substance   | Input                                                                                             | Value(s)                                  | Units   | Descriptive                                                                         | Environment               | Location                                                                                                                     | Details/Notes                             | Reference    |
|-------------|---------------------------------------------------------------------------------------------------|-------------------------------------------|---------|-------------------------------------------------------------------------------------|---------------------------|------------------------------------------------------------------------------------------------------------------------------|-------------------------------------------|--------------|
|             | ( <b>S. knabeni</b> )<br>Sediment concentration<br>(nmol/g dw):<br>25<br>2000                     | 0.57 ± 0.28<br>0.80 ± 0.22                |         | Mean ± SD                                                                           |                           |                                                                                                                              | n = 4                                     |              |
|             | Benthic copepod<br>( <b>Coullana</b> sp.)<br>Sediment concentration<br>(nmol/g dw):<br>25<br>2000 | 0.22 ± 0.05<br>0.49 ± 0.06                |         |                                                                                     |                           |                                                                                                                              | n = 3                                     |              |
|             | Partitioning Values                                                                               | 5.23<br><br>5.16<br>4.58                  |         | Log k <sub>ow</sub> (Mean)<br><br>Log k <sub>ow</sub> (Mean)<br>Log k <sub>oc</sub> | Experimental              | Experimental value from slow-stirring in distilled water at 25°C<br><br>Reported value from literature<br>Humber Estuary, UK | n = 6                                     | 62<br><br>55 |
|             | Sediment Concentration                                                                            | 388 ± 408                                 | ng/g dw | Mean ± SD                                                                           | Estuarine                 | Humber Estuary, UK                                                                                                           | n = 32                                    | 55           |
| <b>DEHP</b> | Concentration (Point Source)<br>Sewage Treatment Effluent                                         | 1.9                                       | µg/L    | Average                                                                             | Effluent                  | Manchester, UK                                                                                                               | n = ?                                     | 63           |
|             | In-River Concentration                                                                            | 0.693<br>0.183<br>0.125<br>0.138<br>0.294 | µg/L    |                                                                                     | Riverine                  | River Mersey, England                                                                                                        | n = 1<br>n = 1<br>n = 1<br>n = 1<br>n = 1 | 64           |
|             |                                                                                                   | 0.4<br>1.6                                | µg/L    | Average<br>Average                                                                  | Riverine                  | River Irwell, Manchester, UK<br>River Etherow, Manchester, UK                                                                | n = ?<br>n = ?                            | 63           |
|             |                                                                                                   | 2.27<br>0.33 – 97.8<br>27.9               | µg/L    | Median<br>Range<br>Median                                                           | Surface Water<br>Riverine | Germany<br>River Rhine, Germany                                                                                              | n = 115<br>n = ?                          | 65           |
|             |                                                                                                   | 9.3                                       | µg/L    | Average                                                                             | Riverine                  | Taiwan                                                                                                                       | n = 14                                    | 66           |
|             | Half – Life in Sediment                                                                           | 14.8                                      | Days    | Average                                                                             | Riverine                  |                                                                                                                              |                                           | 67           |

| Substance  | Input                                                | Value(s)                       | Units                      | Descriptive   | Environment           | Location                                                                                                                                                   | Details/Notes                                                    | Reference |
|------------|------------------------------------------------------|--------------------------------|----------------------------|---------------|-----------------------|------------------------------------------------------------------------------------------------------------------------------------------------------------|------------------------------------------------------------------|-----------|
|            | BSCF to Biota                                        |                                |                            |               | Riverine              | Taiwan                                                                                                                                                     |                                                                  | 68        |
|            | Fish<br>( <i>Liza subviridis</i> )                   | 13.8–40.9                      |                            | Range         |                       |                                                                                                                                                            | <i>n</i> = 2                                                     |           |
|            | ( <i>Oreochromis niloticus niloticus</i> )           | 2.4–28.5                       |                            | Range         |                       |                                                                                                                                                            | <i>n</i> = 3                                                     |           |
|            | ( <i>Acanthopagrus schlegel</i> )                    | 0.1                            |                            | Average       |                       |                                                                                                                                                            | <i>n</i> = 1                                                     |           |
|            | ( <i>Zacco platypus</i> )                            | 0.9                            |                            | Average       |                       |                                                                                                                                                            | <i>n</i> = 1                                                     |           |
|            | Partitioning Values                                  | 7.5                            | Log <i>K</i> <sub>ow</sub> |               |                       | Recommended value determined in review of several experimentally derived values.                                                                           | <i>n</i> = 13                                                    | 69        |
|            | Sediment Concentration                               | 1.220<br>1.199                 | µg/g dw                    |               | Riverine              | River Speke, England<br>River Runcorn, England                                                                                                             | <i>n</i> = 6<br><i>n</i> = 6                                     | 64        |
|            |                                                      | 0.70<br>0.21 – 8.44            | mg/kg dw                   | Median Range  | Riverine              | Brandenburg and Berlin, Germany                                                                                                                            | <i>n</i> = 35                                                    | 65        |
|            |                                                      | 4.6<br>0.5 – 23.9              | µg/g                       | Average Range | Riverine              | Taiwan                                                                                                                                                     | <i>n</i> = 6                                                     | 66        |
| <b>HCB</b> | Concentration (Point Source)<br><i>WWTP Effluent</i> | 3.23<br>1.65 – 4.51            | ng/L                       | Mean Range    | Effluent              | Gaobeidan Lake, Beijing, China                                                                                                                             | <i>n</i> = 6                                                     | 70        |
|            | In-River Concentration                               | <0.001 – 0.002<br><0.001       | µg/L                       | Range<br>Mean | Riverine<br>Estuarine | River Thames, Caversham, England<br>Thames Estuary, Woolwich, England                                                                                      | <i>n</i> = 30<br><i>n</i> = 76                                   | 71        |
|            |                                                      | 61.58<br>53.60<br>9.23<br>5.78 | ng/L                       | Mean          | Riverine              | River Aire, Humber Estuary, England<br>River Calder, Humber Estuary, England<br>River Don, Humber Estuary, England<br>River Trent, Humber Estuary, England | <i>n</i> = 71<br><i>n</i> = 69<br><i>n</i> = 70<br><i>n</i> = 70 | 72        |
|            | Half – Life in Sediment                              |                                |                            |               |                       |                                                                                                                                                            |                                                                  |           |
|            | BSCF to Biota                                        |                                |                            |               |                       |                                                                                                                                                            |                                                                  |           |





| Substance  | Input                                                | Value(s)                                                                        | Units           | Descriptive              | Environment | Location                                                                                                                                                                                                                                         | Details/Notes              | Reference |
|------------|------------------------------------------------------|---------------------------------------------------------------------------------|-----------------|--------------------------|-------------|--------------------------------------------------------------------------------------------------------------------------------------------------------------------------------------------------------------------------------------------------|----------------------------|-----------|
|            | Partitioning Values                                  | 3.7 – 4.9                                                                       | Median Range    | Log $k_{ow}$             |             |                                                                                                                                                                                                                                                  |                            | 77        |
|            |                                                      | 4.90                                                                            |                 | Log $k_{oc}$             |             |                                                                                                                                                                                                                                                  |                            | 78        |
|            |                                                      | 4.9<br>3.8 – 6.7                                                                |                 | Log $k_p$                |             |                                                                                                                                                                                                                                                  |                            | 73        |
|            |                                                      | 4.8                                                                             |                 | Log $k_{ow}$             |             |                                                                                                                                                                                                                                                  |                            |           |
|            | Sediment Concentration                               | 7.3<br>6.11 – 8.71                                                              | Mean Range      | $\mu\text{g/kg dw}$      | Riverine    | Ebro River Basin, NE Spain                                                                                                                                                                                                                       | Surface sediments. $n = 2$ | 79        |
| <b>HCH</b> | Concentration (Point Source)<br><i>WWTP Effluent</i> | 18.0<br>13.2 – 26.7                                                             | ng/L            | Mean Range               | Effluent    | Gaobeidan Lake, Beijing, China                                                                                                                                                                                                                   | $n = 6$                    | 70        |
|            | In-River Concentration                               | 6.93<br>4.41<br>0.81<br>22.94<br>6.4<br>9.45<br>10.26<br>11.33<br>5.28<br>11.69 | ng/L            | Mean Range<br>Mean Range | Riverine    | Yu Rivulet, Fujian Province, China<br>Quiulu Rivulet, Fujian Province, China<br>Quiulu Rivulet, Fujian Province, China<br>Hanjiang River, Fujian Province, China<br>Hanjiang River, Fujian Province, China<br>Yu Rivulet, Fujian Province, China | High Tide<br><br>Low Tide  | 80        |
|            | $\gamma$ -HCH                                        | 0.017<br>0.06 – 0.032<br>0.037<br>0.005 – 0.136                                 | $\mu\text{g/L}$ |                          | Riverine    | Quiulu Rivulet, Fujian Province, China<br>Quiulu Rivulet, Fujian Province, China<br>Hanjiang River, Fujian Province, China<br>Hanjiang River, Fujian Province, China<br><br>River Lee, England<br><br>Tributaries of the River Lee, England      | HCH (gamma)                | 81        |
|            | Half – Life in Sediment                              | 90                                                                              | Days            |                          |             |                                                                                                                                                                                                                                                  | Calculated                 | 76        |

[illegible]

Transport of nonpolar organic compounds from surface water to groundwater. Laboratory sorption studies.(85)

1

2 **Table S5. Notes on data sources**

|                            |                |                                                                                                                                                                          |
|----------------------------|----------------|--------------------------------------------------------------------------------------------------------------------------------------------------------------------------|
| Point source Concentration | Me-Hg          | as default (me-Hg) assumed the same as [Hg-dissolved] good agreement between UK and US (Gbondo-Tugbawa et al. (2010)) data for effluents                                 |
|                            | PCBs           | data for Quebec WwTW (Phram and Proulx (1997)) for congener 118                                                                                                          |
|                            | HCB            | Meharg et al. (1998) Aire and Calder (contaminated at 0.05 ug/l, Trent and Don (not contaminated) at 0.01 ug/l                                                           |
|                            | HCBD           | Jürgens et al. (2013)                                                                                                                                                    |
|                            | HCH            | Snook et al (2004)                                                                                                                                                       |
| t1/2                       |                |                                                                                                                                                                          |
|                            | TBT            | Sakultantimetha et al. (2011) seems a little long re the 80 days I have seen elsewhere                                                                                   |
|                            | Me-Hg          | Cesario et al. (2017) looks like a ridiculous value                                                                                                                      |
|                            | PCB(118)       | Sinkkonen and Paasivirta (2000)                                                                                                                                          |
|                            | HBCDD          | Davis et al. (2006)                                                                                                                                                      |
|                            | cypermethrin   | Hernandez-Guzman et al. (2017) 6-20 days                                                                                                                                 |
|                            | PFOS           | nd 41 yr in water                                                                                                                                                        |
|                            | PFOA           | nd                                                                                                                                                                       |
|                            | Benzo(a)pyrene | Mackay and Hickie (1999)                                                                                                                                                 |
|                            | Fluoranthene   | Readman et al. (1987)                                                                                                                                                    |
|                            | DEHP           | Chao et al. (2007)                                                                                                                                                       |
|                            | HCB            | nd                                                                                                                                                                       |
|                            | HCBD           | Onogbosele et al. (2014) Cranfield                                                                                                                                       |
|                            | HCH            | Onogbosele et al. (2014) range 1-12                                                                                                                                      |
| BSCF                       |                | <i>Variability on organisms can be a source of uncertainty if the species of interest is very different from that tested</i>                                             |
|                            | TBT            | Garg et al. (2009) variable between 8 and 50 but sediments contaminated so chose 10                                                                                      |
|                            | Me-Hg          | Vieira et al. (2018) quite variable                                                                                                                                      |
|                            | PCB (118)      | Harrad and Smith (1997) Severn 2.2-4.8 chose 3 ell pike                                                                                                                  |
|                            | HBCDD          | Van Beusekom et al. (2006) around 1                                                                                                                                      |
|                            | cypermethrin   | Labadie and Chevreuil (2011) chironomids                                                                                                                                 |
|                            | PFOS           | Labadie and Chevreuil (2011) chubb around 1 to plasma                                                                                                                    |
|                            | PFOA           | Higgins et al. (2007) lumbriculus lipid normalised? – Need to back calculates to whole organism – assuming lumbriculus is 5% lipid the published BSCF of 33 becomes 1.65 |
|                            | Benzo(a)pyrene | Lu et al. (2009) oligochaete                                                                                                                                             |
|                            | Fluoranthene   | Driscoll et al. (1997) amphipods                                                                                                                                         |
|                            | dehp           | Huang et al. (2008) very variably this value for minnow other ranges 10-30                                                                                               |
|                            | HCB            | nd                                                                                                                                                                       |
|                            | HCBD           | nd                                                                                                                                                                       |
|                            | HCH            | nd                                                                                                                                                                       |
| Kp                         |                | <i>Note log kp values might be log kow or log koc, in which case they require adjustment to a nominal Kp</i>                                                             |

|                            |                |                                                                                                                                                                                                                                                     |
|----------------------------|----------------|-----------------------------------------------------------------------------------------------------------------------------------------------------------------------------------------------------------------------------------------------------|
| Point source Concentration | Me-Hg          | as default (me-Hg) assumed the same as [Hg-dissolved] good agreement between UK and US (Gbondo-Tugbawa et al. (2010)) data for effluents                                                                                                            |
|                            | TBT            | Bangkedphol et al. (2009) proper logkp 3.64<br>Reviews of Environmental Contamination and Toxicology 166 edited by George W. Ware vol 166 p 1048 J Meador Predictign the fate and effects of tributyltin in marine ssytems logkoc 4.7               |
|                            | Me-Hg          | Marvin-Dipasquale et al. (2009) 2.5-4 proper - v low re mercury a value of log kp of 6.46 has been used from:<br>Moriarty F. and French M.C. (1977) Mercury in waterways that drain into the Wash, in Eastern England. Water Research, 11, 367-372. |
|                            | PCBs           | Butcher et al. (1998)                                                                                                                                                                                                                               |
|                            | HBCDD          | Gustavsson et al. (2013) modelled koc                                                                                                                                                                                                               |
|                            | Cypermethrin   | EA WFD dossier Science Report: SC040038/SR7 SNIFFER log koc 5.5<br>Maund et al. (2002) dependent on OC this for 3%                                                                                                                                  |
|                            | PFOS           | Labadie and Chevreuil (2011) proper kd 2.4 koc 3.7. EA RA gives koc as 2.6                                                                                                                                                                          |
|                            | PFOA           | ECHA (2013) log kow EA RA gives koc as 2.85                                                                                                                                                                                                         |
|                            | Benzo(a)pyrene | Latimer and Zhen (2003) kow                                                                                                                                                                                                                         |
|                            | Fluoranthene   | Maagd et al. (1998) log kow                                                                                                                                                                                                                         |
|                            | DEHP           | Staples et al. (1997) log kow                                                                                                                                                                                                                       |
|                            | HCB            | Oliver and Kaiser (1986) range 4.5-7.3                                                                                                                                                                                                              |
|                            | HCBD           | Lerche et al. (2002) Taylor et al. (2003) Oliver and Kaiser (1986) range narrow                                                                                                                                                                     |
|                            | HCH            | Xiao et al. (2004) for different conformers log Kow                                                                                                                                                                                                 |

3

4

## 5 References

- 6 1. Cavalheiro J., Zuloaga O., Prieto, A., Preudhomme H., Amouroux D. and Monperrus  
7 M. Occurrence and Fate of Organic and Organometallic Pollutants in Municipal Wastewater  
8 Treatment Plants and Their Impact on Receiving Waters (Adour Estuary, France). Archives  
9 of Environmental Contamination and Toxicology. 2017, 73, 619–630.
- 10 2. Díez S., Lacorte S., Viana P., Barceló D. and Bayona M. Survey of organotin  
11 compounds in rivers and coastal environments in Portugal 1999–2000. Environmental  
12 Pollution, 2005, 136(3), 525-536.
- 13 3. Dowson P.H., Bubb J.M. Lester J.N. Organotin distribution in sediments and waters  
14 of selected east coast estuaries in the UK. Marine Pollution Bulletin, 24(10), 492-498.
- 15 4. UKWIR. UK Water Industry Research, Chemical Investigation Programme. Phase 2.  
16 2015-202. Tranche 2 dataset.
- 17 5. Sakultantimetha A., Keenan H.E., Beattie T.K. Bangkedphol S. Cavoura O.  
18 Bioremediation of tributyltin contaminated sediment: Degradation enhancement and  
19 improvement of bioavailability to promote treatment processes. Chemosphere, 83(5), 680-  
20 686.
- 21 6. Garg A., Antón-Martín R., García-Luque E., Riba I., DelValls T.A. Distribution of  
22 butyltins (TBT, DBT, MBT) in sediments of Gulf of Cádiz (Spain) and its bioaccumulation in  
23 the clam *Ruditapes philippinarum*. Ecotoxicology, 2009, 18, 1029–1035.

- 24 7. Bangkedphol S., Keenan H.E., Davidson C., Sakultantimetha A., Songsasen A. The  
25 partition behavior of tributyltin and prediction of environmental fate, persistence and toxicity  
26 in aquatic environments. *Chemosphere*, 2009, 77(10) 1326-1332.
- 27 8. Buggy C.J., Tobin J.M. Seasonal and spatial distributions of tributyltin in surface  
28 sediment of the Tolka Estuary, Dublin, Ireland. *Environmental Pollution*, 2006, 143(2), 294-  
29 303.
- 30 9. Gbondo-Tugbawa S.S., McAlear J.A., Driscoll C.T., Sharpe C.W. Total and methyl  
31 mercury transformations and mass loadings within a wastewater treatment plant and the  
32 impact of the effluent discharge to an alkaline hypereutrophic lake. *Water Research*, 2020,  
33 44(9), 2863-2875.
- 34 10. Domagalski J. Mercury and methylmercury in water and sediment of the Sacramento  
35 River Basin, California. *Applied Geochemistry*, 2001, 16(15), 1677-1691.
- 36 11. Cesárioa R., Hintelmann H., Mendes R., Eckey K., Dimock B., Araújo B., Mota AM,  
37 Canário J., Evaluation of mercury methylation and methylmercury demethylation rates in  
38 vegetated and non-vegetated saltmarsh sediments from two Portuguese estuaries.  
39 *Environmental Pollution*, 2017, 226, 297-307.
- 40 12. Vieira M., Bernardi J.V.E., Dórea J.G., Rocha B.C.P., Ribeiro R., Zara L.F.  
41 Distribution and availability of mercury and methylmercury in different waters from the Rio  
42 Madeira Basin, Amazon. *Environmental Pollution*, 2018, 235, 771-779.
- 43 13. DiPasquale M.M., Lutz M.A., Brigham M.E., Krabbenhoft D.P., Aiken G.R., Orem  
44 W.H., Hall B.D. Mercury Cycling in Stream Ecosystems. 2. Benthic Methylmercury  
45 Production and Bed Sediment-Pore Water Partitioning. *Environmental Pollution*, 2018, 235,  
46 771-779.
- 47 14. Moriarty F. and French M.C. Mercury in waterways that drain into the Wash, in  
48 Eastern England. *Water Research*, 1977, 11, 367-372.
- 49 15. Croston N.J., Bubb J.M., Lester J.N. Spatial distribution and seasonal changes in  
50 methylmercury concentrations in shallow lakes. *Hydrobiologia*, 1996, 321, 35-45.
- 51 16. Pham T.T., Proulx S. PCBs and PAHs in the Montreal Urban Community (Quebec,  
52 Canada) wastewater treatment plant and in the effluent plume in the St Lawrence River.  
53 *Water Research*, 1997, 31(8), 1887-1896.
- 54 17. Sinkkonen S., Paasivirta J. Degradation half-life times of PCDDs, PCDFs and PCBs  
55 for environmental fate modelling. *Chemosphere*, 2000, 40, 943-949.
- 56 18. Harrad S.J. and Smith D.J.T. Bioaccumulation Factors (BAFs) and Biota to Sediment  
57 Accumulation Factors (BSAFs) for PCBs in pike and eels. *Environmental Science and  
58 Pollution Research*, 1997, 4, 189-193.
- 59 19. Wong C.S., Capel P.D., Nowell L.H. National-Scale, Field-Based Evaluation of the  
60 Biota-Sediment Accumulation Factor Model. *Environ. Sci. Technol.* 2001, 35, 9, 1709-1715.
- 61 20. Butcher J.B., Garvey E.A., Bierman Jr V.J. Equilibrium partitioning of PCB congeners  
62 in the water column: Field measurements from the Hudson River. *Chemosphere*, 1998,  
63 36(15), 3149-3166.

- 64 21. Vane C.H., Harrison I., Kim A.W. Polycyclic aromatic hydrocarbons (PAHs) and  
65 polychlorinated biphenyls (PCBs) in sediments from the Mersey Estuary, U.K. *Science of*  
66 *The Total Environment*, 2007, 374, 112-126
- 67 22. Morris S., Allchin C.R., Zegers B.N., Haftka J.J.H., Boon J.P., Belpaire C., Leonards  
68 P.E.G., van Leeuwen S.P.J., de Boer J. Distribution and Fate of HBCD and TBBPA  
69 Brominated Flame Retardants in North Sea Estuaries and Aquatic Food Webs. *Environ. Sci.*  
70 *Technol.* 2004, 38(21), 5497–5504.
- 71 23. Davis J.W., Gonsior S.J., Markham D.A., Friederich U., Hunziker R.W., Ariano J.M.  
72 Biodegradation and Product Identification of [<sup>14</sup>C]Hexabromocyclododecane in Wastewater  
73 Sludge and Freshwater Aquatic Sediment. *Environ. Sci. Technol.* 2006, 40(17), 5395–5401.
- 74 24. van Beusekom O.C., Eljarrat E., Barceló D., Koelmans A.A. Dynamic modeling of  
75 food-chain accumulation of brominated flame retardants in fish from the Ebro River Basin,  
76 Spain. *Environmental Toxicology and Chemistry*. 2009, 25(10), 2553-2560.
- 77 25. Gustavsson J. et al. Omanalys av flamskyddsmedel i svenska vattendrag. 2013.  
78 Available at: [https://pub.epsilon.slu.se/13578/1/gustavsson\\_j\\_et\\_al\\_160817.pdf](https://pub.epsilon.slu.se/13578/1/gustavsson_j_et_al_160817.pdf).
- 79 26. Eljarrat E., de la Cal A., Raldúa D., Barcelo D. Brominated flame retardants in  
80 *Alburnus alburnus* from Cinca River Basin (Spain). *Environmental Pollution*, 2005, 133(3),  
81 501-8.
- 82 27. Hernández-Guzmán F.A., Macías-Zamora J.V., Ramírez-Álvarez N., Alvarez-Aguilar  
83 A., Hernández C.Q., Fonseca A.P. Treated wastewater effluent as a source of pyrethroids  
84 and fipronil at Todos Santos Bay, Mexico: Its impact on sediments and organisms.  
85 *Environmental Toxicology and Chemistry*, 2017, 36(11), 3057-3064.
- 86 28. Feo M.L., Ginebreda A., Eljarrat E., Barceló D. Presence of pyrethroid pesticides in  
87 water and sediments of Ebro River Delta. *Journal of Hydrology*, 393, 156-162.
- 88 29. Maund S.J., Hamer M.J., Lane M.C.G., Farrelly E., Rapley J.H., Goggin U.M., Gentle  
89 W.E. Partitioning, bioavailability, and toxicity of the pyrethroid insecticide cypermethrin in  
90 sediments. *Environmental Toxicology and Chemistry*, 2002, 21(1), 9-15.
- 91 30. Ahrens L., Felizeter S., Sturm R., Xie Z., Ebinghaus R. Polyfluorinated compounds in  
92 waste water treatment plant effluents and surface waters along the River Elbe, Germany.  
93 *Marine Pollution Bulletin*, 2009, 58(9), 1326-1333.
- 94 31. Becker A.M., Gerstmann S., Frank H. Perfluorooctane surfactants in waste waters,  
95 the major source of river pollution. *Chemosphere*, 2008, 72(1), 115-121.
- 96 32. Becker A.M., Gerstmann S., Frank H. Perfluorooctanoic acid and perfluorooctane  
97 sulfonate in the sediment of the Roter Main river, Bayreuth, Germany. *Environmental*  
98 *Pollution*, 2008, 156(3), 818-820.
- 99 33. Labadie P., Chevreuil M. Partitioning behaviour of perfluorinated alkyl contaminants  
100 between water, sediment and fish in the Orge River (nearby Paris, France). *Environmental*  
101 *Pollution*, 2011, 159(2), 391-397.
- 102 34. Hekster, F.M., De Voogt, P., Pijnenburg, A.M.C.M., Laane, R.W.P.M.  
103 Perfluoroalkylated substances: Aquatic environmental assessment. TU Delft, 2007, 1<sup>st</sup> July.

- 104 35. Johnson R.L., Anschutz A.J., Smolen J. The Adsorption of Perfluorooctane Sulfonate  
105 onto Sand, Clay, and Iron Oxide Surfaces. *Journal of Chemical & Engineering Data*, 2007,  
106 52(4), 345-360.
- 107 36. Sinclair E., Mayack D.T., Roblee K., Yamashita N., Kannan K. Occurrence of  
108 perfluoroalkyl surfactants in water, fish, and birds from New York State. *Arch Environ*  
109 *Contam Toxicol.*, 2006, 50(3), 398-410.
- 110 37. Plumlee M.H., Larabee J., Reinhard M. Perfluorochemicals in water reuse.  
111 *Chemosphere*, 2008, 72(10), 1541-1547.
- 112 38. Busch J., Ahrens R., Sturm R., Ebinghaus R. Polyfluoroalkyl compounds in landfill  
113 leachates. *Environmental Pollution*, 2020, 158(5), 1467-1471.
- 114 39. Worldwide surveys of perfluorooctane sulfonate (PFOS) and perfluorooctanoic acid  
115 (PFOA) in water environment in recent years
- 116 40. Kunacheva C., Fujii S., Tanaka S., Shuhei S et al. Worldwide surveys of  
117 perfluorooctane sulfonate (PFOS) and perfluorooctanoic acid (PFOA) in water environment  
118 in recent years. *Water Science and Technology*, 2022, 66 (12), 2764-2771.
- 119 41. McLachlan M., Holmstrom K.E., Reth M., Berger U. Riverine discharge of  
120 perfluorinated carboxylates from the European continent. *Environ. Sci. Technol.* 2007, 41,  
121 7260-7265.
- 122 42. Loos R., Manfred B., Giovanni G., Locoro G., Rimaviciute E., Contini S., Bidoglio G.  
123 EU-wide survey of polar organic persistent pollutants in European river waters.  
124 *Environmental Pollution*, 2009, 157(2), 561-568.
- 125 43. Vierke L., Staude C., Biegel-Engler A., Drost W., Schulte C. Perfluorooctanoic acid  
126 (PFOA) — main concerns and regulatory developments in Europe from an environmental  
127 point of view. *Environmental Sciences Europe* 2012, 24, 16.
- 128 44. Higgins, C.P., McLeod, P.B., Macmanus-Spencer, L.A., Luthy, R.G., Bioaccumulation  
129 of perfluorochemicals in sediments by the aquatic oligochaete *Lumbriculus variegatus*.  
130 *Environmental Science and Technology*, 2007, 41, 4600-4606.  
131
- 132 45. Ahrens L., Yeung L.W.Y., Taniyasu S., Lamb P.K.S., Yamashita N. Partitioning of  
133 perfluorooctanoate (PFOA), perfluorooctane sulfonate (PFOS) and perfluorooctane  
134 sulfonamide (PFOSA) between water and sediment. *Chemosphere*, 2011, 85(5), 731-737.
- 135 46. ECHA. Substance Name: Pentadecafluorooctanoic Acid (PFOA). EC Number: 206-  
136 397-9, CAS Number: 335-67-1. MEMBER STATE committee support document for  
137 identification of pentadecafluorooctanoic acid (PFOA) as a substance of very high concern  
138 because of its CMR and PBT properties.  
139 <https://echa.europa.eu/documents/10162/8059e342-1092-410f-bd85-80118a5526f5>.
- 140 47. Clara M., Gans O., Weiss S., Sanz-Escribano D., Scharf S., Scheffknecht C.  
141 Perfluorinated alkylated substances in the aquatic environment: An Austrian case study.  
142 *Water Research*, 2009, 43(18), 4760-4768.
- 143 48. Zareitalabada P., Siemens J., Hamer M., Amelung W. Perfluorooctanoic acid (PFOA)  
144 and perfluorooctanesulfonic acid (PFOS) in surface waters, sediments, soils and wastewater



- 145 – A review on concentrations and distribution coefficients. *Chemosphere*, 2013, 91(6), 725-  
146 732.
- 147 49. Gardner M., Comber S., Scrimshaw M., Cartmell E., Lester J. and Ellor B. The  
148 significance of hazardous chemicals in wastewater treatment works effluents. *Science of the*  
149 *Total Environment*, 2012, 437, 363-372.
- 150 50. Mackay D., Hickie D. Mass balance model of source apportionment, transport and  
151 fate of PAHs in Lac Saint Louis, Quebec. *Chemosphere*, 2000, 41(5), 681-692.
- 152 51. Lu X., Reible D.D., Fleeger J.W. Bioavailability and assimilation of  
153 sediment-associated benzo[a]pyrene by *Ilyodrilus templetoni* (oligochaeta). *Environmental*  
154 *Toxicology and Chemistry*, 2004, 23(1), 57-64.
- 155 52. Latimer J.S. and Zheng J. The sources, transport and fate of PAHs in the marine  
156 environment. Wiley.
- 157 53. Vane C.H., Harrison I., Kim A.W. Polycyclic aromatic hydrocarbons (PAHs) and  
158 polychlorinated biphenyls (PCBs) in sediments from the Mersey Estuary, U.K. *Science of*  
159 *The Total Environment*, 2007, 374(1), 112-126.
- 160 54. Phillips P, Chalmers A. Wastewater effluent, combined sewer overflows and other  
161 sources of organic compounds to Lake Chaplain. *J Am Water Res. Ass.* 2009, 45(1) 45-58.
- 162 55. Zhou J.L., Fileman T.W., House W.H., Long J.L.A., Mantoura R.F.C, Meharg A.A.,  
163 Osborn D., Wright J. Fluxes of Organic Contaminants from the River Catchment into,  
164 through and out of the Humber Estuary, UK. *Marine Pollution Bulletin*, 1999, 37, 330-342.
- 165 56. Entec European report, 2011, available at:  
166 <https://circabc.europa.eu/webdav/CircaBC/env/wfd/Library>.
- 167 57. Gustafson K.E., Dickhut R.M. Distribution of polycyclic aromatic hydrocarbons in  
168 southern Chesapeake Bay surface water: Evaluation of three methods for determining freely  
169 dissolved water concentrations. *Environmental Toxicology and Chemistry*, 1997, 16(3), 452-  
170 461.
- 171 58. Readman, J.W., Mantoura R.F.C., Rhead M.M. A record of polycyclic aromatic  
172 hydrocarbon (PAH) pollution obtained from accreting sediments of the Tamar Estuary. UK:  
173 Evidence for non-equilibrium behaviour of PAH. *Sci. Total Environ.*, 1987, 66, 73-94.
- 174 59. Tansel B., Fuentes C., Sanchez M., Predoi K., Acevedo M. Persistence profile of  
175 polyaromatic hydrocarbons in shallow and deep Gulf waters and sediments: Effect of water  
176 temperature and sediment–water partitioning characteristics. *Marine Pollution Bulletin*, 2011,  
177 62(12), 2659-2665.
- 178 60. Driscoll S.K., Harkey G.A., Landrum P.F. Accumulation and toxicokinetics of  
179 fluoranthene in sediment bioassays with freshwater amphipods. *Environmental Toxicology*  
180 *and Chemistry*, 1997, 16(4), 742-753.
- 181 61. Lutufo G.R. Bioaccumulation of sediment-associated fluoranthene in benthic  
182 copepods: uptake, elimination and biotransformation. *Aquatic Toxicology*, 1998, 44, 1-15.
- 183 62. Gert-Jan de Maagd P., ten Hulscher D.E.M., van den Heuvel H., Opperhuizen A.,  
184 Sijm D.T.H.M. Physicochemical properties of polycyclic aromatic hydrocarbons: Aqueous  
185 solubilities, n-octanol/water partition coefficients, and Henry's law constants. *Environmental*  
186 *Toxicology and Chemistry*, 1998, 17(2), 251-257.

- 187 63. Fatoki O.S., Vernon F. Phthalate esters in rivers of the greater Manchester area, U.K.  
188 Science of The Total Environment, 19990, 95, 227-232.
- 189 64. Preston M.R., Al-Omran L.A. Phthalate ester speciation in estuarine water,  
190 suspended particulates and sediments. Environmental Pollution, 1989, 62, 183-193.
- 191 65. Fromme H., Kuchler T., Ottoc T., Pilz K., Müller J., Wenzel A. Occurrence of  
192 phthalates and bisphenol A and F in the environment. Water Research, 2002, 36(6), 1429-  
193 1438.
- 194 66. Yuan Y., Liu C., Liao C.S., Chang B.V. Occurrence and microbial degradation of  
195 phthalate esters in Taiwan river sediments. Chemosphere, 2002, 49(10), 1295-1299.
- 196 67. Chao W.L., Cheng C.Y. Effect of introduced phthalate-degrading bacteria on the  
197 diversity of indigenous bacterial communities during di-(2-ethylhexyl) phthalate (DEHP)  
198 degradation in a soil microcosm. Chemosphere, 2007, 67(3), 482-488.
- 199 68. Huang P.C., Tien C.J., Sun Y.M., Hsieh C.Y., Lee C.C. Occurrence of phthalates in  
200 sediment and biota: Relationship to aquatic factors and the biota-sediment accumulation  
201 factor. Chemosphere, 2008, 73(4), 539-544.
- 202 69. Staples C.A., Peterson D.R., Parkerton T.F., Adams W.J. The environmental fate of  
203 phthalate esters: A literature review. Chemosphere, (35(4), 667-749.
- 204 70. Li X., Zhang Q., Cao H., Jiang G., Xu, M. Pesticide contamination profiles of water,  
205 sediment and aquatic organisms in the effluent of Gaobeidian wastewater treatment plant.  
206 Chemosphere, 72(8), 1145-1151.
- 207 71. Jürgens M.D., Johnson A., Jones K.C., Hughes D., Lawlor A.J. The presence of EU  
208 priority substances mercury, hexachlorobenzene, hexachlorobutadiene and PBDEs in wild  
209 fish from four English rivers. Science of The Total Environment, 2013, 461-462.
- 210 72. Meharg A.A., Wright J, Osborn D. The frequency of Environmental Quality Standard  
211 (EQS) exceedance for chlorinated organic pollutants in rivers of the Humber catchments.  
212 Science of The Total Environment, 1998, 210-211, 219-228.
- 213 73. Oliver B.G., Kaiser K.L.E. Chlorinated Organics in Nearshore Waters and Tributaries  
214 of the St. Clair River. Water Quality Research Journal of Canada, 1986, 21(3), 344-350.
- 215 74. Kim K.S., Sang H., Lee C., Kim K.H., Yoon J.H., Kim J.G. Survey on organochlorine  
216 pesticides, PCDD/Fs, dioxin-like PCBs and HCB in sediments from the Han river, Korea.  
217 Chemosphere, 2009, 75(5), 580-587.
- 218 75. Grimalt J.O., van Drooge B.L., Ribes A., Vilanova R.M., Fernandez P., Appleby P.  
219 Persistent organochlorine compounds in soils and sediments of European high altitude  
220 mountain lakes. Chemosphere, 2004, 54(10), 1549-1561.
- 221 76. Onogbesele C.O., Scrimshaw M.D. Hexabromocyclododecane and  
222 Hexachlorocyclohexane: How Lessons Learnt Have Led to Improved Regulation. Journal  
223 Critical Reviews in Environmental Science and Technology, 2014, 44, 1423-1442.
- 224 77. Lerche D., van de Plassche E., Schwegler A., Balk F. Selecting chemical substances  
225 for the UN-ECE POP Protocol. Chemosphere, 2002, 47(6), 617-630.

- 226 78. Taylor K.W., Caux P.Y., Moore D.R.J. An Ecological Risk Assessment of  
227 Hexachlorobutadiene. *Human and Ecological Risk Assessment: An International Journal*,  
228 2003, 9(2), 511-525.
- 229 79. Lacorte S., Raldúa D., Martínez E., Navarro E., Diez S., Bayona J.M., Barceló D.  
230 Pilot survey of a broad range of priority pollutants in sediment and fish from the Ebro river  
231 basin (NE Spain). *Environmental Pollution*, 2006, 140(3), 471-482.
- 232 80. Wang Y., Qi S., Xing X., Xu M. Distribution and Ecological Risk Evaluation of  
233 Organochlorine Pesticides in Sediments from Xinghua Bay, China. *Journal of Earth Science*,  
234 2009, 20(4), 763-770.
- 235 81. Snook D and Whitehead P.G. Water quality and ecology of the River Lee: mass  
236 balance and a review of temporal and spatial data. *Hydrology and Earth Systems*, 2004,  
237 8(4), 636-650.
- 238 82. Xiao H, Li N, Wania F. Compilation, evaluation, and selection of physical-chemical  
239 property data for  $\alpha$ -,  $\beta$ -, and  $\gamma$ -hexachlorocyclohexane. *J Chem Eng Data.*, 2004, 49, 173–  
240 185.
- 241 83. Paschke A., Schüürmann G. Concentration Dependence of the Octanol/Water  
242 Partition Coefficients of the Hexachlorocyclohexane Isomers at 25 °C. *Chemical and*  
243 *Engineering Technology*, 2000, 23(8), 666-670.
- 244 84. Guzzella L., Roscioli C., Viganò L., Saha M., Sarkar S.K., Bhattacharya A. Evaluation  
245 of the concentration of HCH, DDT, HCB, PCB and PAH in the sediments along the lower  
246 stretch of Hugli estuary, West Bengal, northeast India. *Environment International*, 2005,  
247 31(4), 523-534.
- 248 85. Schwarzenbach R.P., Westall J., Transport of nonpolar organic compounds from  
249 surface water to groundwater. Laboratory sorption studies. *Environ. Sci. Technol.*, 1981, 15  
250 (11), pp 1360–1367.

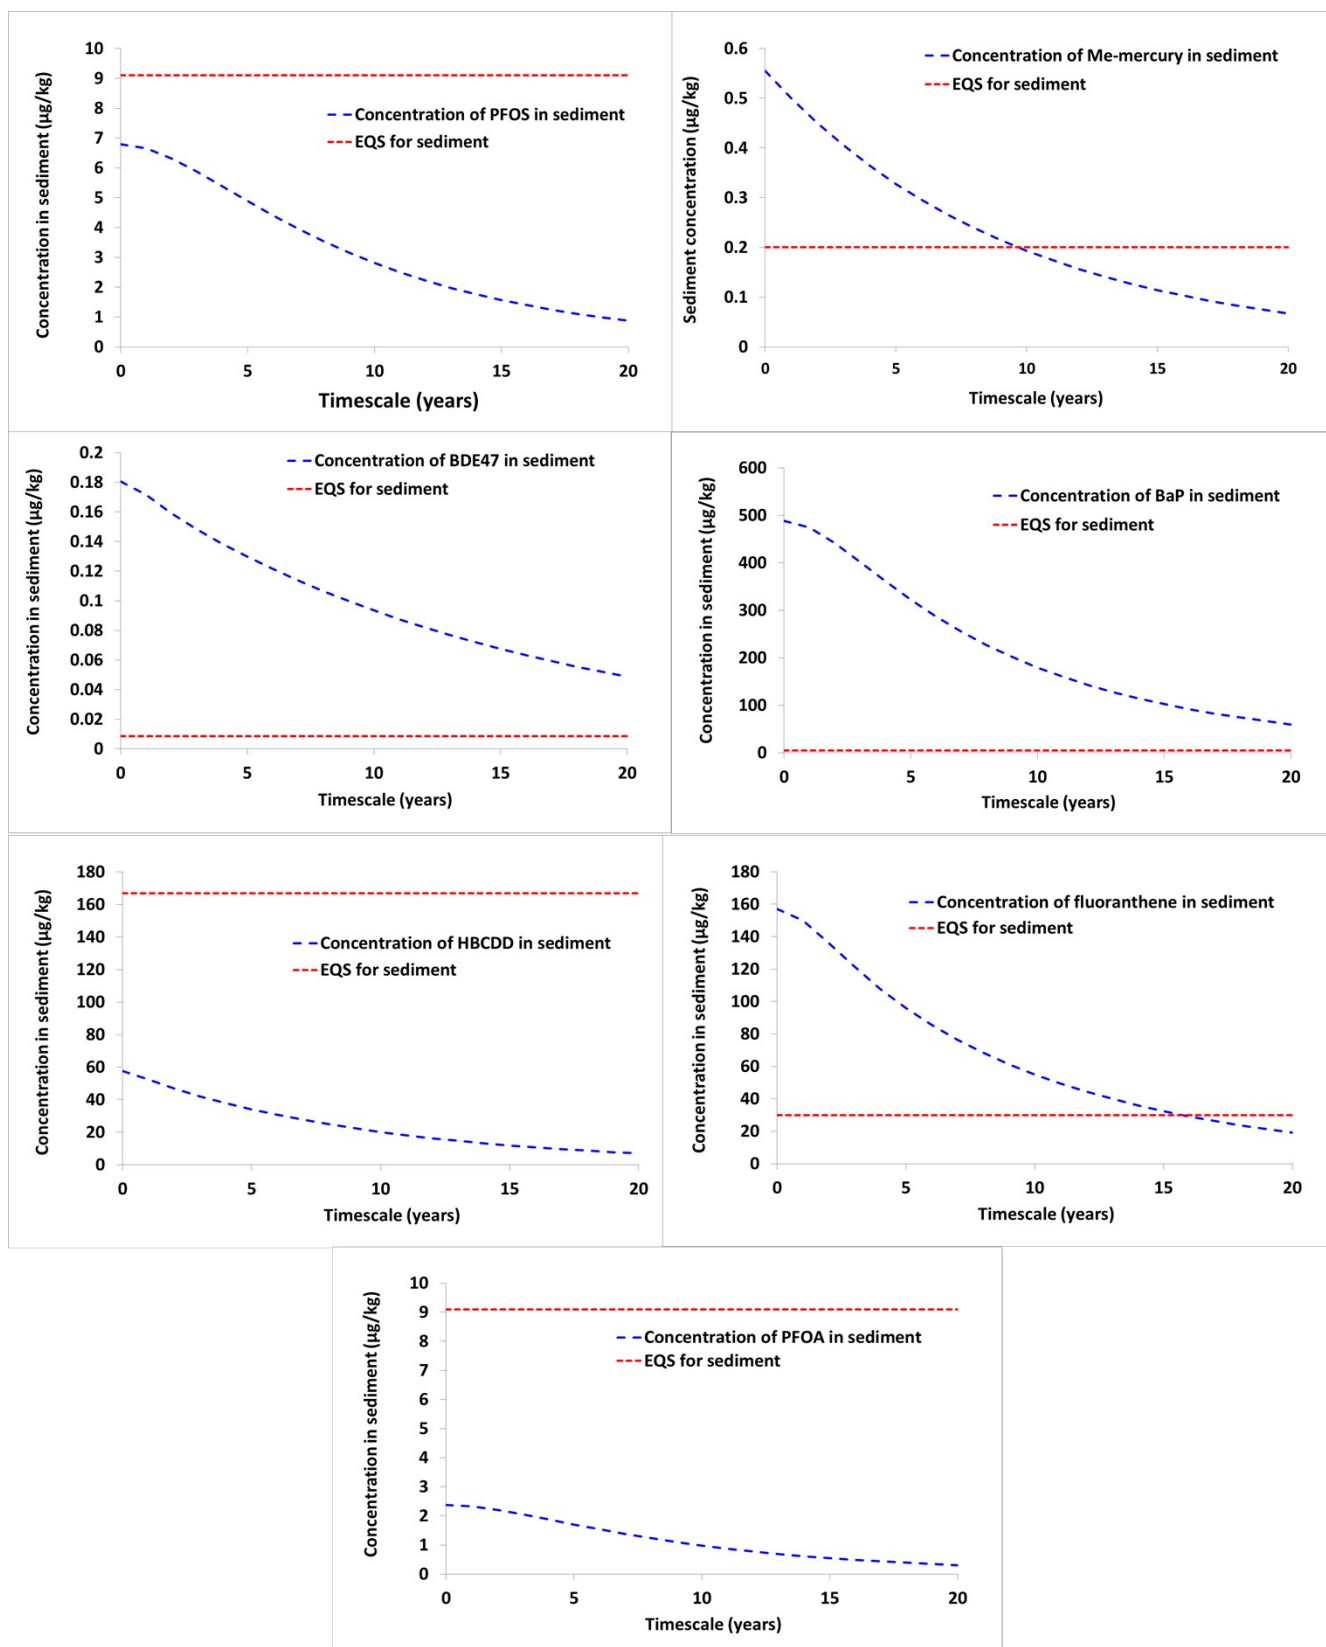

**Figure S1** Illustrations of decline in sediment contaminant concentrations for APR reductions of 10% in both types of inputs (scenario 2)

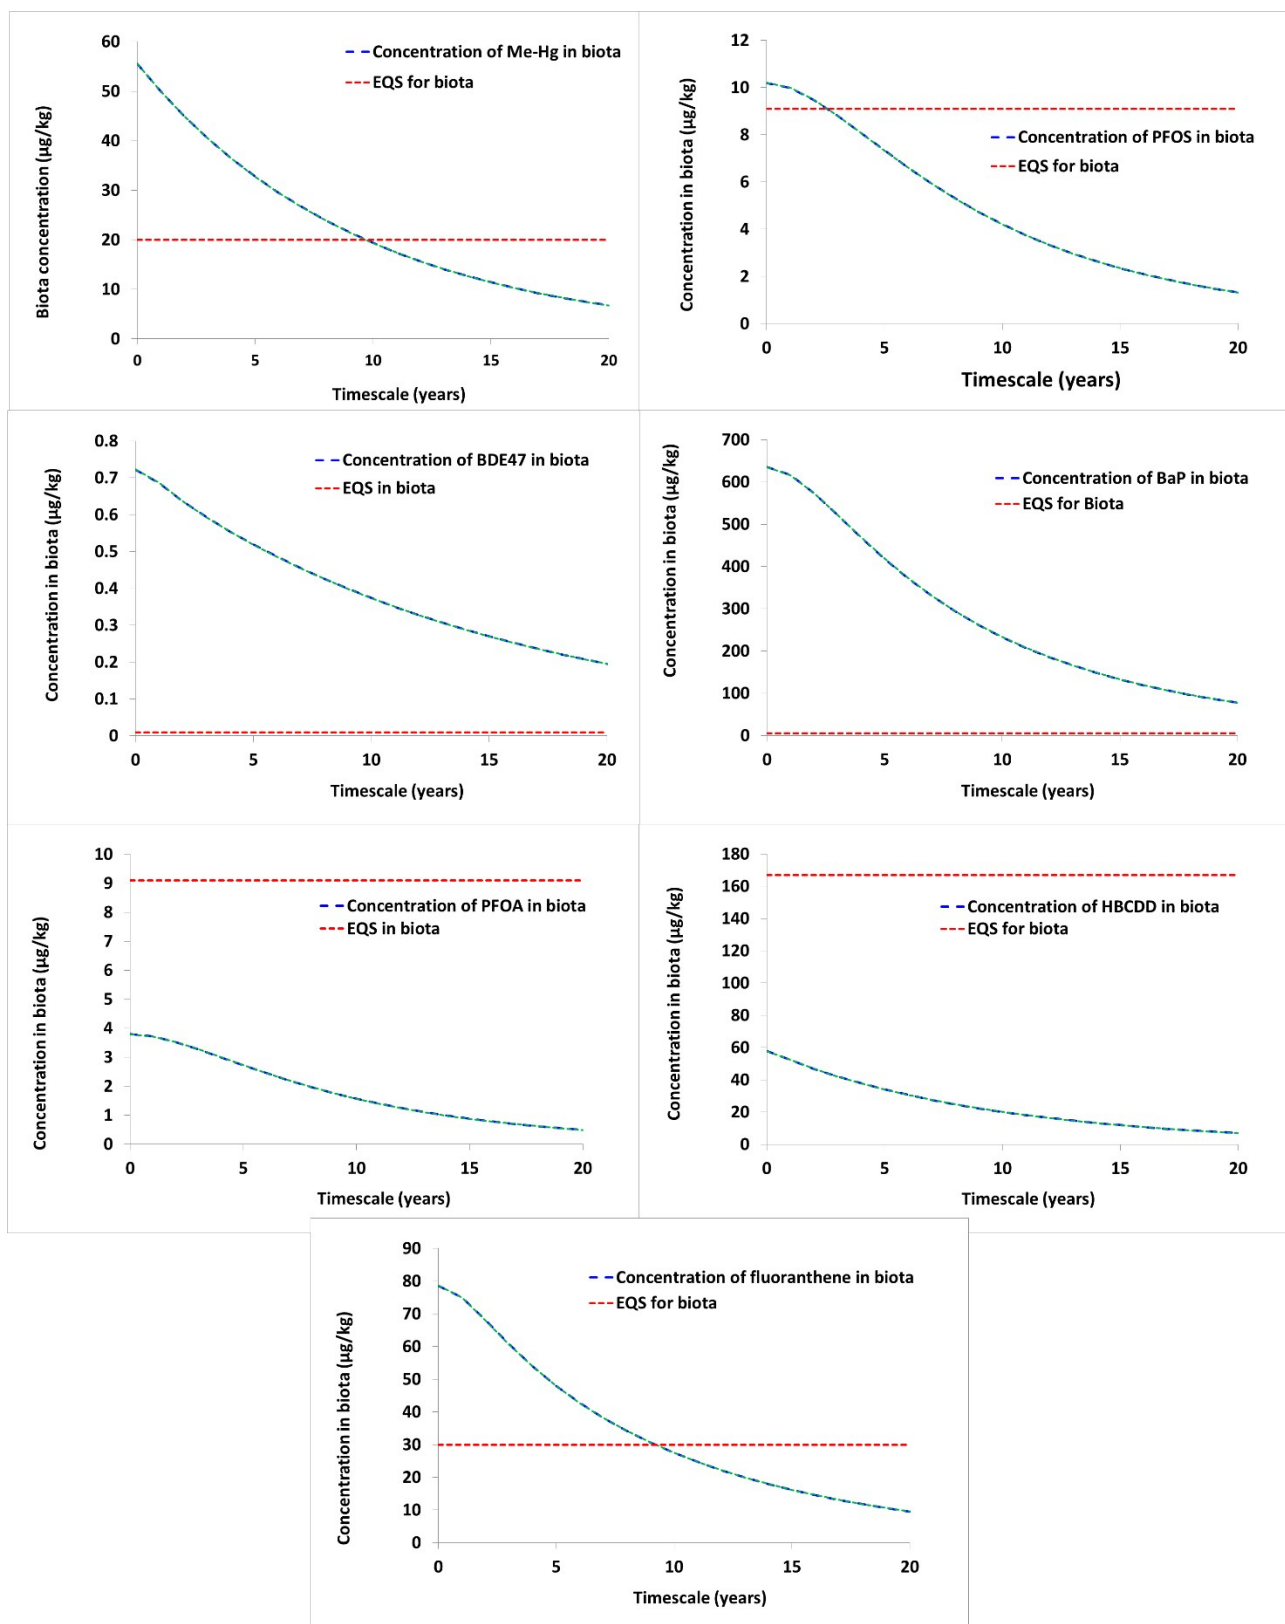

**Figure S2** Illustrations of decline in biota contaminant concentrations for APR reductions of 10% in both types of inputs (scenario 2)
